# Supplementary material for: Organocatalytic asymmetric synthesis of 3-difluoroalkyl 3-hydroxyoxindoles
Source: Royal Society of Chemistry journal article supplement (doi:10.1039/c2cc17140f), 2011-12-20
Supplement: c2cc17140f_3.pdf [file c2cc17140f_3.pdf]

# Organocatalytic asymmetric synthesis of 3-difluoroalkyl 3-hydroxyoxindoles

Yun-Lin Liu<sup>a</sup> and Jian Zhou<sup>\*ab</sup>

<sup>a</sup> Shanghai Key Laboratory of Green Chemistry and Chemical Processes, Department of Chemistry, East China Normal University, 3663N Zhongshan Road, Shanghai 200062, China, *E-mail: jzhou@chem.ecnu.edu.cn*

<sup>b</sup> State Key Laboratory of Elemento-organic Chemistry, Nankai University, Tianjin 300071, P. R. China.

## Supporting Information (Part III)

| Content                                | Page |
|----------------------------------------|------|
| HPLC spectra of product 8a-s and 13-16 | 2-24 |

Operator: dell Timebase: U-3000 Sequence: lyl Page 1-1  
 2011-6-20 7:43

| 1286 lyl-lf-00-2FCH3OH-asy-OZH-85/15-230 |                                     |                   |          |
|------------------------------------------|-------------------------------------|-------------------|----------|
| Sample Name:                             | lyl-lf-00-2FCH3OH-asy-OZH-85/15-230 | Injection Volume: | 20.0     |
| Vial Number:                             | 999                                 | Channel:          | UV_VIS_1 |
| Sample Type:                             | standard                            | Wavelength:       | 290      |
| Control Program:                         | Liu Yunlin                          | Bandwidth:        | n.a.     |
| Quantif. Method:                         | lyl                                 | Dilution Factor:  | 1.0000   |
| Recording Time:                          | 2011-3-28 11:21                     | Sample Weight:    | 1.0000   |
| Run Time (min):                          | 28.78                               | Sample Amount:    | 1.0000   |

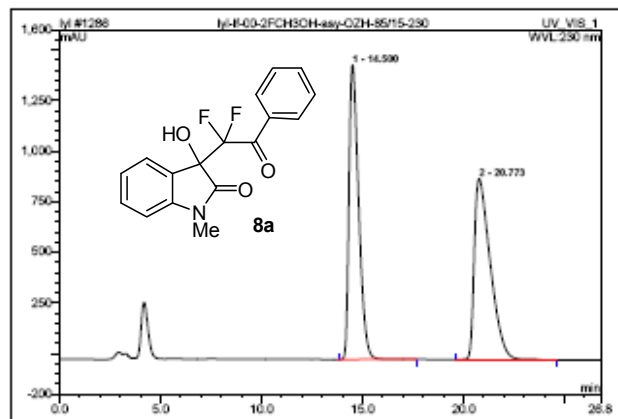

| No.    | Ret. Time min | Peak Name | Height mAU | Area mAU*min | Rel. Area % | Amount | Type |
|--------|---------------|-----------|------------|--------------|-------------|--------|------|
| 1      | 14.50         | n.a.      | 1455.076   | 807.929      | 49.74       | n.a.   | BMB* |
| 2      | 20.77         | n.a.      | 892.168    | 816.228      | 50.26       | n.a.   | BMB* |
| Total: |               |           | 2347.244   | 1624.157     | 100.00      | 0.000  |      |

default/integration

Chromeleon (c) Dionex 1996-2006  
 Version 6.80 SR8a Build 2643 (158225)

Operator: dell Timebase: U-3000 Sequence: lyl Page 1-1  
 2011-6-20 7:42

| 1631 lyl-lg-111-1-asy-oz-85/15-230 |                               |                   |          |
|------------------------------------|-------------------------------|-------------------|----------|
| Sample Name:                       | lyl-lg-111-1-asy-oz-85/15-230 | Injection Volume: | 20.0     |
| Vial Number:                       | 999                           | Channel:          | UV_VIS_1 |
| Sample Type:                       | standard                      | Wavelength:       | 290      |
| Control Program:                   | Liu Yunlin                    | Bandwidth:        | n.a.     |
| Quantif. Method:                   | lyl                           | Dilution Factor:  | 1.0000   |
| Recording Time:                    | 2011-8-6 16:51                | Sample Weight:    | 1.0000   |
| Run Time (min):                    | 20.35                         | Sample Amount:    | 1.0000   |

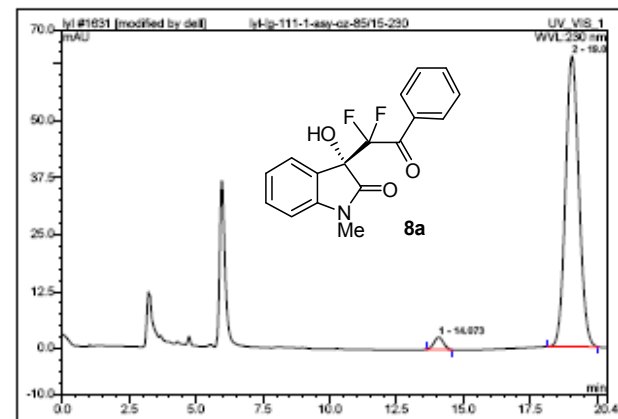

| No.    | Ret. Time min | Peak Name | Height mAU | Area mAU*min | Rel. Area % | Amount | Type |
|--------|---------------|-----------|------------|--------------|-------------|--------|------|
| 1      | 14.07         | n.a.      | 2.595      | 1.109        | 2.90        | n.a.   | BMB* |
| 2      | 19.06         | n.a.      | 63.828     | 37.110       | 97.10       | n.a.   | BMB* |
| Total: |               |           | 66.523     | 38.219       | 100.00      | 0.000  |      |

default/integration

Chromeleon (c) Dionex 1996-2006  
 Version 6.80 SR8a Build 2643 (158225)

Operator: dell Timebase: U-3000 Sequence: yl

Page 1-1  
 2011-7-19 10:45

1900 Iyl-Ih-135-1-*rac*-oz-75/25-230

|                  |                                        |                   |          |
|------------------|----------------------------------------|-------------------|----------|
| Sample Name:     | Iyl-Ih-135-1- <i>rac</i> -oz-75/25-230 | Injection Volume: | 20.0     |
| Vial Number:     | 898                                    | Channel:          | UV_V18_1 |
| Sample Type:     | standard                               | Wavelength:       | 290      |
| Control Program: | Liu Yunlin                             | Bandwidth:        | n.a.     |
| Quantif. Method: | Iyl                                    | Dilution Factor:  | 1.0000   |
| Recording Time:  | 2011-7-19 22:28                        | Sample Weight:    | 1.0000   |
| Run Time (min):  | 12.03                                  | Sample Amount:    | 1.0000   |

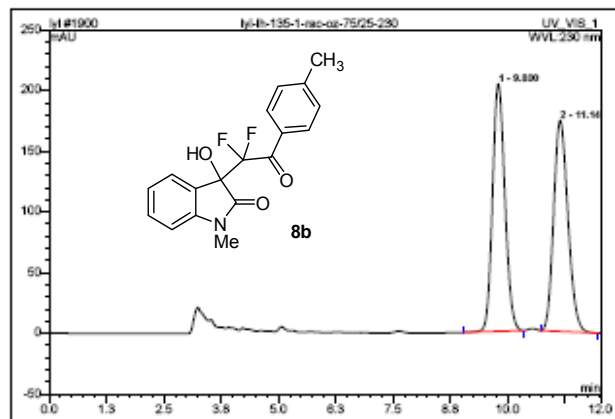

| No.    | Ret. Time min | Peak Name | Height mAU | Area mAU*min | Rel. Area % | Amount | Type |
|--------|---------------|-----------|------------|--------------|-------------|--------|------|
| 1      | 9.80          | n.a.      | 203.862    | 63.683       | 50.38       | n.a.   | BMB  |
| 2      | 11.15         | n.a.      | 173.642    | 62.732       | 49.62       | n.a.   | BMB  |
| Total: |               |           | 377.504    | 126.415      | 100.00      | 0.000  |      |

Operator: dell Timebase: U-3000 Sequence: yl

Page 1-1  
 2011-7-19 10:44

1895 Iyl-Ih-135-1-*asy*-oz-75/25-230

|                  |                                        |                   |          |
|------------------|----------------------------------------|-------------------|----------|
| Sample Name:     | Iyl-Ih-135-1- <i>asy</i> -oz-75/25-230 | Injection Volume: | 20.0     |
| Vial Number:     | 898                                    | Channel:          | UV_V18_1 |
| Sample Type:     | standard                               | Wavelength:       | 290      |
| Control Program: | Liu Yunlin                             | Bandwidth:        | n.a.     |
| Quantif. Method: | Iyl                                    | Dilution Factor:  | 1.0000   |
| Recording Time:  | 2011-7-19 21:08                        | Sample Weight:    | 1.0000   |
| Run Time (min):  | 16.22                                  | Sample Amount:    | 1.0000   |

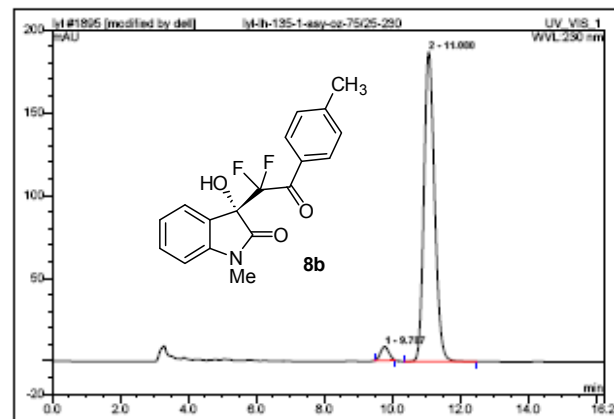

| No.    | Ret. Time min | Peak Name | Height mAU | Area mAU*min | Rel. Area % | Amount | Type |
|--------|---------------|-----------|------------|--------------|-------------|--------|------|
| 1      | 9.79          | n.a.      | 8.342      | 2.381        | 3.40        | n.a.   | BMB* |
| 2      | 11.08         | n.a.      | 186.915    | 67.698       | 96.60       | n.a.   | BMB* |
| Total: |               |           | 195.256    | 70.069       | 100.00      | 0.000  |      |

default/integration

Chromeleon (c) Dionex 1996-2006  
 Version 6.80 (SR6a Build 2643 (158225))

default/integration

Chromeleon (c) Dionex 1996-2006  
 Version 6.80 (SR6a Build 2643 (158225))

Operator: dell Timebase: U-3000 Sequence: yl

Page 1-1  
 2011-6-20 5:14

1707 Iyl-Ih-135-2-*rac*-oz-80/20-230

|                  |                                        |                   |          |
|------------------|----------------------------------------|-------------------|----------|
| Sample Name:     | Iyl-Ih-135-2- <i>rac</i> -oz-80/20-230 | Injection Volume: | 20.0     |
| Vial Number:     | 898                                    | Channel:          | UV_VIS_1 |
| Sample Type:     | standard                               | Wavelength:       | 290      |
| Control Program: | Liu Yunlin                             | Bandwidth:        | n.a.     |
| Quantif. Method: | Iyl                                    | Dilution Factor:  | 1.0000   |
| Recording Time:  | 2011-6-17 22:33                        | Sample Weight:    | 1.0000   |
| Run Time (min):  | 13.83                                  | Sample Amount:    | 1.0000   |

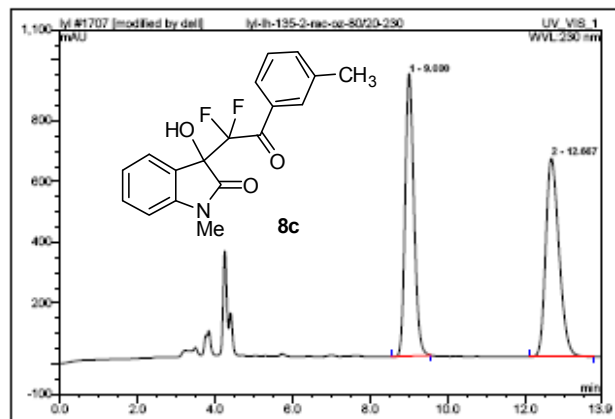

| No.    | Ret. Time min | Peak Name | Height mAU | Area mAU*min | Rel. Area % | Amount | Type |
|--------|---------------|-----------|------------|--------------|-------------|--------|------|
| 1      | 9.00          | n.a.      | 930.114    | 244.807      | 48.57       | n.a.   | BMB* |
| 2      | 12.67         | n.a.      | 653.210    | 259.208      | 51.43       | n.a.   | BMB  |
| Total: |               |           | 1583.324   | 504.015      | 100.00      | 0.000  |      |

default/integration

Chromeleon (c) Dionex 1996-2006  
 Version 6.80 (SR8a Build 2643 (158225))

Operator: dell Timebase: U-3000 Sequence: yl

Page 1-1  
 2011-6-20 5:09

1689 Iyl-Ig-135-2-*asy*-oz-80/20-230

|                  |                                        |                   |          |
|------------------|----------------------------------------|-------------------|----------|
| Sample Name:     | Iyl-Ig-135-2- <i>asy</i> -oz-80/20-230 | Injection Volume: | 20.0     |
| Vial Number:     | 898                                    | Channel:          | UV_VIS_1 |
| Sample Type:     | standard                               | Wavelength:       | 290      |
| Control Program: | Liu Yunlin                             | Bandwidth:        | n.a.     |
| Quantif. Method: | Iyl                                    | Dilution Factor:  | 1.0000   |
| Recording Time:  | 2011-6-17 16:20                        | Sample Weight:    | 1.0000   |
| Run Time (min):  | 14.81                                  | Sample Amount:    | 1.0000   |

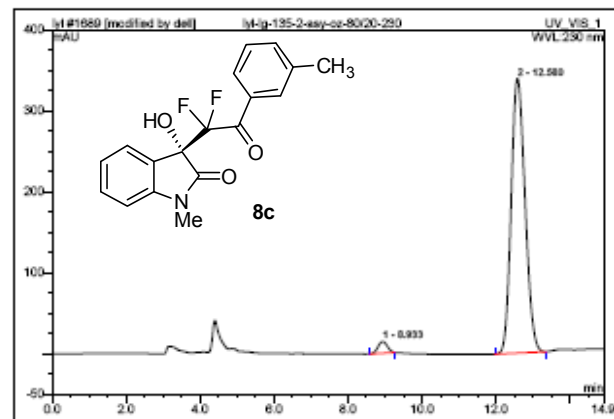

| No.    | Ret. Time min | Peak Name | Height mAU | Area mAU*min | Rel. Area % | Amount | Type |
|--------|---------------|-----------|------------|--------------|-------------|--------|------|
| 1      | 8.93          | n.a.      | 14.275     | 4.160        | 2.74        | n.a.   | BMB* |
| 2      | 12.58         | n.a.      | 339.207    | 147.528      | 97.26       | n.a.   | BMB  |
| Total: |               |           | 353.481    | 151.688      | 100.00      | 0.000  |      |

default/integration

Chromeleon (c) Dionex 1996-2006  
 Version 6.80 (SR8a Build 2643 (158225))

Operator: dell Timebase: U-3000 Sequence: lyl

Page 1-1  
 2011-7-19 10:57

1901 lyl-lh-019-1-*rac*-oz-75/25-230

|                  |                                        |                   |          |
|------------------|----------------------------------------|-------------------|----------|
| Sample Name:     | lyl-lh-019-1- <i>rac</i> -oz-75/25-230 | Injection Volume: | 20.0     |
| Vial Number:     | 898                                    | Channel:          | UV_VIS_1 |
| Sample Type:     | standard                               | Wavelength:       | 290      |
| Control Program: | Liu Yunlin                             | Bandwidth:        | n.a.     |
| Quantif. Method: | lyl                                    | Dilution Factor:  | 1.0000   |
| Recording Time:  | 2011-7-19 22:42                        | Sample Weight:    | 1.0000   |
| Run Time (min):  | 18.84                                  | Sample Amount:    | 1.0000   |

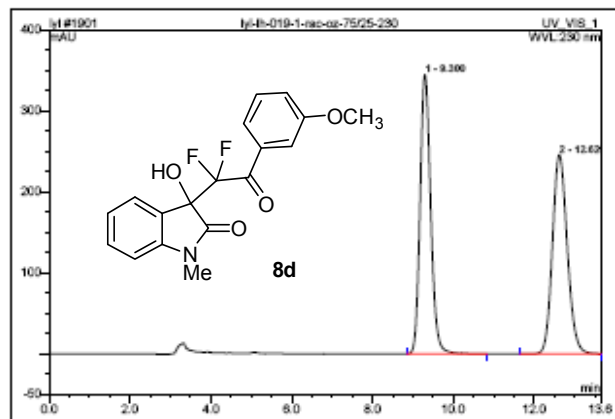

| No.    | Ret. Time min | Peak Name | Height mAU | Area mAU*min | Rel. Area % | Amount | Type |
|--------|---------------|-----------|------------|--------------|-------------|--------|------|
| 1      | 9.30          | n.a.      | 344.655    | 104.682      | 50.08       | n.a.   | BMB  |
| 2      | 12.62         | n.a.      | 245.952    | 104.338      | 49.92       | n.a.   | BMB  |
| Total: |               |           | 590.607    | 209.021      | 100.00      | 0.000  |      |

default/integration

Chromeleon (c) Dionex 1996-2006  
 Version 6.80 (SR8a Build 2643 (158225))

Operator: dell Timebase: U-3000 Sequence: lyl

Page 1-1  
 2011-7-19 10:58

1894 lyl-lh-019-1-*asy*-oz-75/25-230

|                  |                                        |                   |          |
|------------------|----------------------------------------|-------------------|----------|
| Sample Name:     | lyl-lh-019-1- <i>asy</i> -oz-75/25-230 | Injection Volume: | 20.0     |
| Vial Number:     | 898                                    | Channel:          | UV_VIS_1 |
| Sample Type:     | standard                               | Wavelength:       | 290      |
| Control Program: | Liu Yunlin                             | Bandwidth:        | n.a.     |
| Quantif. Method: | lyl                                    | Dilution Factor:  | 1.0000   |
| Recording Time:  | 2011-7-19 20:51                        | Sample Weight:    | 1.0000   |
| Run Time (min):  | 18.51                                  | Sample Amount:    | 1.0000   |

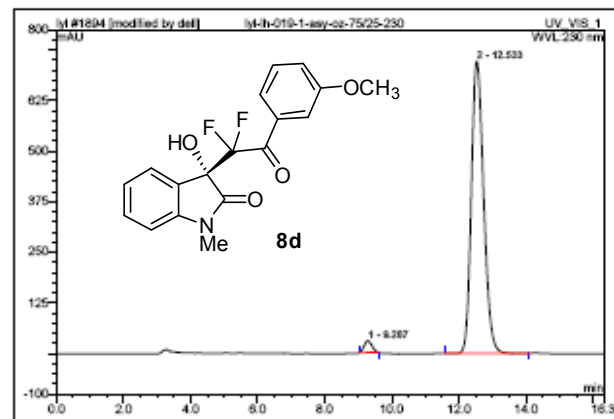

| No.    | Ret. Time min | Peak Name | Height mAU | Area mAU*min | Rel. Area % | Amount | Type |
|--------|---------------|-----------|------------|--------------|-------------|--------|------|
| 1      | 9.29          | n.a.      | 28.874     | 7.817        | 2.50        | n.a.   | BMB* |
| 2      | 12.53         | n.a.      | 721.139    | 305.479      | 97.50       | n.a.   | BMB* |
| Total: |               |           | 750.013    | 313.296      | 100.00      | 0.000  |      |

default/integration

Chromeleon (c) Dionex 1996-2006  
 Version 6.80 (SR8a Build 2643 (158225))

Operator: dell Timebase: U-3000 Sequence: ylj

Page 1-1  
 2011-7-23 10:15

1926 Iyl-Ih-053-2-RAC-oz-85/15-230

|                  |                               |                   |          |
|------------------|-------------------------------|-------------------|----------|
| Sample Name:     | Iyl-Ih-053-2-RAC-oz-85/15-230 | Injection Volume: | 20.0     |
| Vial Number:     | 898                           | Channel:          | UV_VIS_1 |
| Sample Type:     | standard                      | Wavelength:       | 290      |
| Control Program: | Liu Yunlin                    | Bandwidth:        | n.a.     |
| Quantif. Method: | Iyl                           | Dilution Factor:  | 1.0000   |
| Recording Time:  | 2011-7-23 18:06               | Sample Weight:    | 1.0000   |
| Run Time (min):  | 63.89                         | Sample Amount:    | 1.0000   |

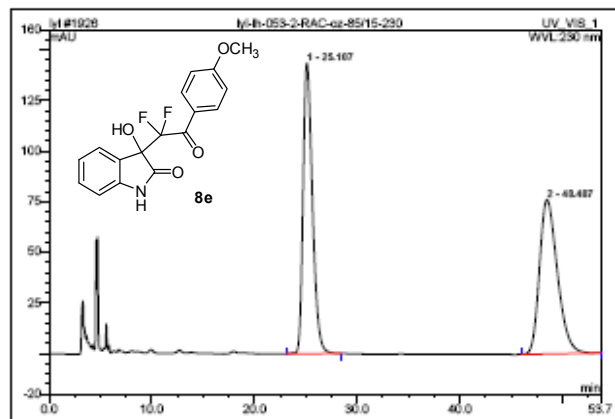

| No.    | Ret. Time min | Peak Name | Height mAU | Area mAU*min | Rel. Area % | Amount | Type |
|--------|---------------|-----------|------------|--------------|-------------|--------|------|
| 1      | 25.11         | n.a.      | 143.520    | 151.626      | 49.62       | n.a.   | BMB  |
| 2      | 48.49         | n.a.      | 76.217     | 153.342      | 50.38       | n.a.   | BMB  |
| Total: |               |           | 219.737    | 305.568      | 100.00      | 0.000  |      |

default/integration

Chromeleon (c) Dionex 1996-2006  
 Version 6.80 (SR8a Build 2643 (158225))

Operator: dell Timebase: U-3000 Sequence: ylj

Page 1-1  
 2011-7-23 10:18

1925 Iyl-Ih-053-2-asy-oz-85/15-230

|                  |                               |                   |          |
|------------------|-------------------------------|-------------------|----------|
| Sample Name:     | Iyl-Ih-053-2-asy-oz-85/15-230 | Injection Volume: | 20.0     |
| Vial Number:     | 898                           | Channel:          | UV_VIS_1 |
| Sample Type:     | standard                      | Wavelength:       | 290      |
| Control Program: | Liu Yunlin                    | Bandwidth:        | n.a.     |
| Quantif. Method: | Iyl                           | Dilution Factor:  | 1.0000   |
| Recording Time:  | 2011-7-23 18:07               | Sample Weight:    | 1.0000   |
| Run Time (min):  | 66.63                         | Sample Amount:    | 1.0000   |

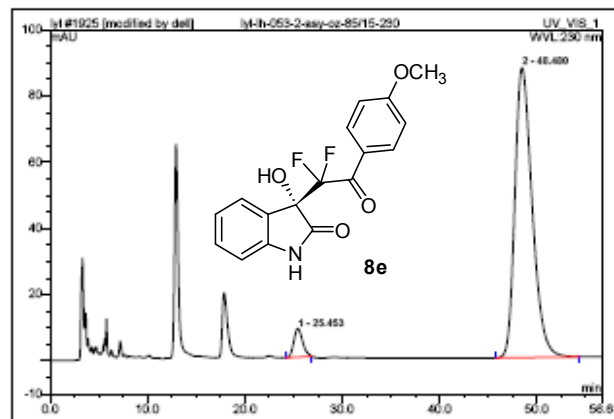

| No.    | Ret. Time min | Peak Name | Height mAU | Area mAU*min | Rel. Area % | Amount | Type |
|--------|---------------|-----------|------------|--------------|-------------|--------|------|
| 1      | 25.45         | n.a.      | 8.606      | 8.979        | 4.75        | n.a.   | BMB* |
| 2      | 48.48         | n.a.      | 87.523     | 180.022      | 95.25       | n.a.   | BMB  |
| Total: |               |           | 96.129     | 189.000      | 100.00      | 0.000  |      |

default/integration

Chromeleon (c) Dionex 1996-2006  
 Version 6.80 (SR8a Build 2643 (158225))

Operator: dell Timebase: U-3000 Sequence: lyl

Page 1-1  
 2011-6-20 7:16

1717 lyl-lh-136-1-*rac*-oz-85/15-230

|                  |                                        |                   |          |
|------------------|----------------------------------------|-------------------|----------|
| Sample Name:     | lyl-lh-136-1- <i>rac</i> -oz-85/15-230 | Injection Volume: | 20.0     |
| Vial Number:     | 898                                    | Channel:          | UV_VIS_1 |
| Sample Type:     | standard                               | Wavelength:       | 290      |
| Control Program: | Liu Yunlin                             | Bandwidth:        | n.a.     |
| Quantif. Method: | lyl                                    | Dilution Factor:  | 1.0000   |
| Recording Time:  | 2011-6-20 18:48                        | Sample Weight:    | 1.0000   |
| Run Time (min):  | 18.85                                  | Sample Amount:    | 1.0000   |

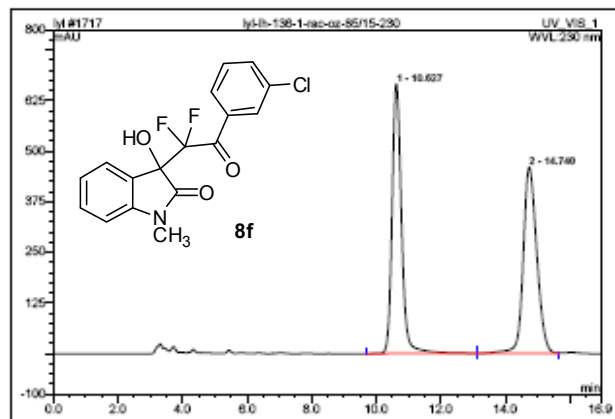

| No.    | Ret.Time min | Peak Name | Height mAU | Area mAU*min | Rel.Area % | Amount | Type |
|--------|--------------|-----------|------------|--------------|------------|--------|------|
| 1      | 10.63        | n.a.      | 666.787    | 225.349      | 50.30      | n.a.   | BM   |
| 2      | 14.74        | n.a.      | 459.166    | 222.645      | 49.70      | n.a.   | MB   |
| Total: |              |           | 1125.953   | 447.994      | 100.00     | 0.000  |      |

default/integration

Chromeleon (c) Dionex 1996-2006  
 Version 6.80 (SR8a Build 2643 (158225))

Operator: dell Timebase: U-3000 Sequence: lyl

Page 1-1  
 2011-6-20 7:08

1716 lyl-lh-136-1-*asy*-oz-85/15-230

|                  |                                        |                   |          |
|------------------|----------------------------------------|-------------------|----------|
| Sample Name:     | lyl-lh-136-1- <i>asy</i> -oz-85/15-230 | Injection Volume: | 20.0     |
| Vial Number:     | 898                                    | Channel:          | UV_VIS_1 |
| Sample Type:     | standard                               | Wavelength:       | 290      |
| Control Program: | Liu Yunlin                             | Bandwidth:        | n.a.     |
| Quantif. Method: | lyl                                    | Dilution Factor:  | 1.0000   |
| Recording Time:  | 2011-6-20 18:30                        | Sample Weight:    | 1.0000   |
| Run Time (min):  | 16.75                                  | Sample Amount:    | 1.0000   |

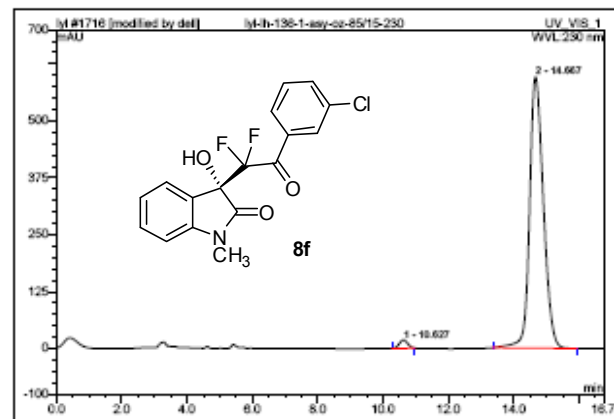

| No.    | Ret.Time min | Peak Name | Height mAU | Area mAU*min | Rel.Area % | Amount | Type |
|--------|--------------|-----------|------------|--------------|------------|--------|------|
| 1      | 10.63        | n.a.      | 18.220     | 5.423        | 1.83       | n.a.   | BMB* |
| 2      | 14.67        | n.a.      | 595.116    | 290.832      | 98.17      | n.a.   | BMB* |
| Total: |              |           | 613.336    | 296.256      | 100.00     | 0.000  |      |

default/integration

Chromeleon (c) Dionex 1996-2006  
 Version 6.80 (SR8a Build 2643 (158225))

Operator: dell Timebase: U-3000 Sequence: lyl

Page 1-1  
 2011-6-20 6:50

1715 lyl-lh-135-3-*rac*-oz-85/15-230

|                  |                                        |                   |          |
|------------------|----------------------------------------|-------------------|----------|
| Sample Name:     | lyl-lh-135-3- <i>rac</i> -oz-85/15-230 | Injection Volume: | 20.0     |
| Vial Number:     | 898                                    | Channel:          | UV_VI8_1 |
| Sample Type:     | standard                               | Wavelength:       | 290      |
| Control Program: | Liu Yunlin                             | Bandwidth:        | n.a.     |
| Quantif. Method: | lyl                                    | Dilution Factor:  | 1.0000   |
| Recording Time:  | 2011-6-20 18:13                        | Sample Weight:    | 1.0000   |
| Run Time (min):  | 18.87                                  | Sample Amount:    | 1.0000   |

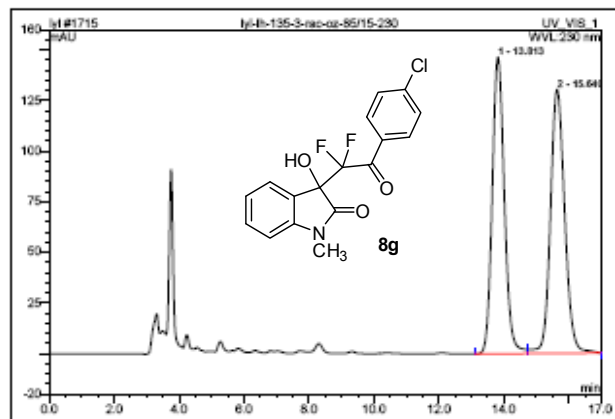

| No.    | Ret.Time min | Peak Name | Height mAU | Area mAU*min | Rel.Area % | Amount | Type |
|--------|--------------|-----------|------------|--------------|------------|--------|------|
| 1      | 13.81        | n.a.      | 146.578    | 63.385       | 48.88      | n.a.   | BM   |
| 2      | 15.64        | n.a.      | 130.368    | 66.292       | 51.12      | n.a.   | MB   |
| Total: |              |           | 276.946    | 129.677      | 100.00     | 0.000  |      |

default/integration

Chromeleon (c) Dionex 1996-2006  
 Version 6.80 (SR8a Build 2643 (158225))

Operator: dell Timebase: U-3000 Sequence: lyl

Page 1-1  
 2011-6-20 6:49

1714 lyl-lh-135-3-*asy*-oz-85/15-230

|                  |                                        |                   |          |
|------------------|----------------------------------------|-------------------|----------|
| Sample Name:     | lyl-lh-135-3- <i>asy</i> -oz-85/15-230 | Injection Volume: | 20.0     |
| Vial Number:     | 898                                    | Channel:          | UV_VI8_1 |
| Sample Type:     | standard                               | Wavelength:       | 290      |
| Control Program: | Liu Yunlin                             | Bandwidth:        | n.a.     |
| Quantif. Method: | lyl                                    | Dilution Factor:  | 1.0000   |
| Recording Time:  | 2011-6-20 17:21                        | Sample Weight:    | 1.0000   |
| Run Time (min):  | 17.48                                  | Sample Amount:    | 1.0000   |

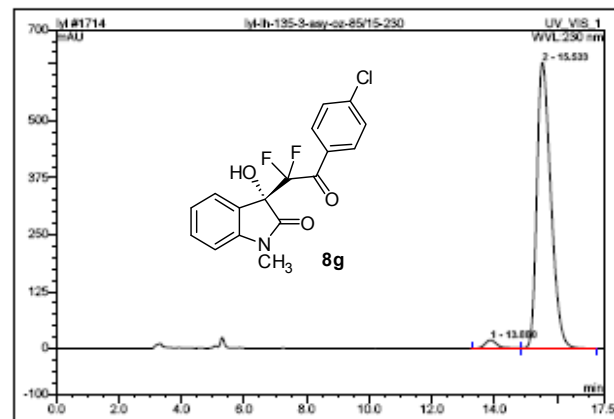

| No.    | Ret.Time min | Peak Name | Height mAU | Area mAU*min | Rel.Area % | Amount | Type |
|--------|--------------|-----------|------------|--------------|------------|--------|------|
| 1      | 13.88        | n.a.      | 18.584     | 8.654        | 2.59       | n.a.   | BM   |
| 2      | 15.53        | n.a.      | 627.723    | 325.938      | 97.41      | n.a.   | MB   |
| Total: |              |           | 646.307    | 334.592      | 100.00     | 0.000  |      |

default/integration

Chromeleon (c) Dionex 1996-2006  
 Version 6.80 (SR8a Build 2643 (158225))



Operator: dell Timebase: U-3000 Sequence: yl

Page 1-1  
 2011-7-19 10:16

1898 yl-lh-019-3-*rac*-oz-75/25-230

|                  |                                       |                   |          |
|------------------|---------------------------------------|-------------------|----------|
| Sample Name:     | yl-lh-019-3- <i>rac</i> -oz-75/25-230 | Injection Volume: | 20.0     |
| Vial Number:     | 898                                   | Channel:          | UV_VIS_1 |
| Sample Type:     | standard                              | Wavelength:       | 290      |
| Control Program: | Liu Yunlin                            | Bandwidth:        | n.a.     |
| Quantif. Method: | yl                                    | Dilution Factor:  | 1.0000   |
| Recording Time:  | 2011-7-19 22:00                       | Sample Weight:    | 1.0000   |
| Run Time (min):  | 12.87                                 | Sample Amount:    | 1.0000   |

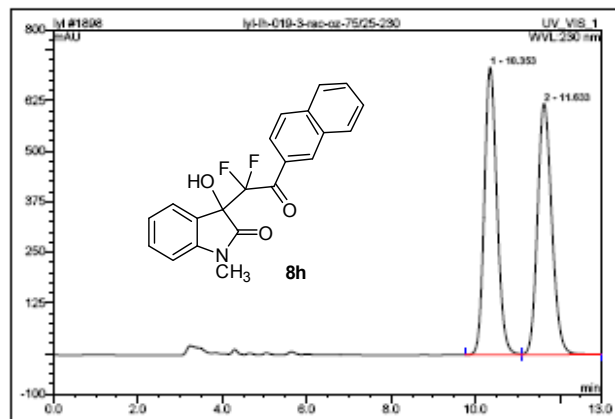

| No.    | Ret. Time min | Peak Name | Height mAU | Area mAU*min | Rel. Area % | Amount | Type |
|--------|---------------|-----------|------------|--------------|-------------|--------|------|
| 1      | 10.35         | n.a.      | 710.114    | 245.024      | 50.09       | n.a.   | BM   |
| 2      | 11.63         | n.a.      | 620.262    | 244.166      | 49.91       | n.a.   | MB   |
| Total: |               |           | 1330.376   | 489.190      | 100.00      | 0.000  |      |

default/Integration

Chromeleon (c) Dionex 1996-2006  
 Version 6.80 (SR6a Build 2643 (158225))

Operator: dell Timebase: U-3000 Sequence: yl

Page 1-1  
 2011-7-19 10:16

1897 yl-lh-019-3-*asy*-oz-75/25-230

|                  |                                       |                   |          |
|------------------|---------------------------------------|-------------------|----------|
| Sample Name:     | yl-lh-019-3- <i>asy</i> -oz-75/25-230 | Injection Volume: | 20.0     |
| Vial Number:     | 898                                   | Channel:          | UV_VIS_1 |
| Sample Type:     | standard                              | Wavelength:       | 290      |
| Control Program: | Liu Yunlin                            | Bandwidth:        | n.a.     |
| Quantif. Method: | yl                                    | Dilution Factor:  | 1.0000   |
| Recording Time:  | 2011-7-19 21:44                       | Sample Weight:    | 1.0000   |
| Run Time (min):  | 14.51                                 | Sample Amount:    | 1.0000   |

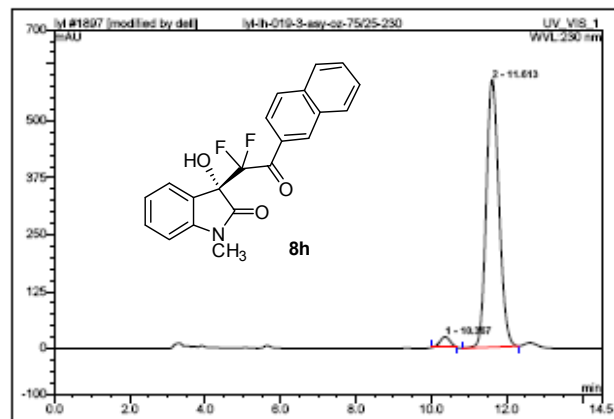

| No.    | Ret. Time min | Peak Name | Height mAU | Area mAU*min | Rel. Area % | Amount | Type |
|--------|---------------|-----------|------------|--------------|-------------|--------|------|
| 1      | 10.37         | n.a.      | 23.529     | 7.436        | 3.13        | n.a.   | BMB* |
| 2      | 11.61         | n.a.      | 587.819    | 229.877      | 96.87       | n.a.   | BMB* |
| Total: |               |           | 611.348    | 237.313      | 100.00      | 0.000  |      |

default/Integration

Chromeleon (c) Dionex 1996-2006  
 Version 6.80 (SR6a Build 2643 (158225))

Operator: dell Timebase: U-3000 Sequence: lyl

Page 1-1  
 2011-7-19 10:03

1891 lyl-lh-020-1-*rac*-oz-75/25-230

|                  |                                        |                   |          |
|------------------|----------------------------------------|-------------------|----------|
| Sample Name:     | lyl-lh-020-1- <i>rac</i> -oz-75/25-230 | Injection Volume: | 20.0     |
| Vial Number:     | 898                                    | Channel:          | UV_VIS_1 |
| Sample Type:     | standard                               | Wavelength:       | 290      |
| Control Program: | Liu Yunlin                             | Bandwidth:        | n.a.     |
| Quantif. Method: | lyl                                    | Dilution Factor:  | 1.0000   |
| Recording Time:  | 2011-7-19 18:37                        | Sample Weight:    | 1.0000   |
| Run Time (min):  | 18.81                                  | Sample Amount:    | 1.0000   |

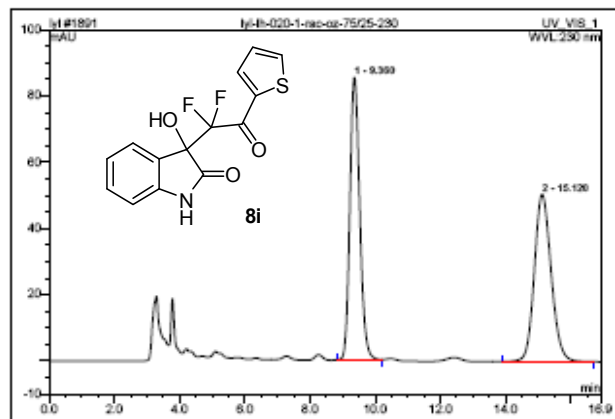

| No.    | Ret. Time min | Peak Name | Height mAU | Area mAU*min | Rel. Area % | Amount | Type |
|--------|---------------|-----------|------------|--------------|-------------|--------|------|
| 1      | 9.36          | n.a.      | 85.237     | 25.710       | 49.59       | n.a.   | BMB  |
| 2      | 15.12         | n.a.      | 50.488     | 30.207       | 50.41       | n.a.   | BMB  |
| Total: |               |           | 135.725    | 55.918       | 100.00      | 0.000  |      |

default/integration

Chromeleon (c) Dionex 1996-2006  
 Version 6.80 (SR6a Build 2643 (158225))

Operator: dell Timebase: U-3000 Sequence: lyl

Page 1-1  
 2011-7-19 10:02

1896 lyl-lh-020-1-*asy*-oz-75/25-230

|                  |                                        |                   |          |
|------------------|----------------------------------------|-------------------|----------|
| Sample Name:     | lyl-lh-020-1- <i>asy</i> -oz-75/25-230 | Injection Volume: | 20.0     |
| Vial Number:     | 898                                    | Channel:          | UV_VIS_1 |
| Sample Type:     | standard                               | Wavelength:       | 290      |
| Control Program: | Liu Yunlin                             | Bandwidth:        | n.a.     |
| Quantif. Method: | lyl                                    | Dilution Factor:  | 1.0000   |
| Recording Time:  | 2011-7-19 21:27                        | Sample Weight:    | 1.0000   |
| Run Time (min):  | 17.24                                  | Sample Amount:    | 1.0000   |

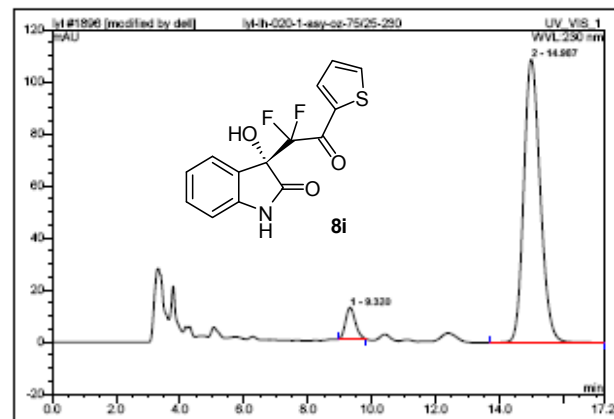

| No.    | Ret. Time min | Peak Name | Height mAU | Area mAU*min | Rel. Area % | Amount | Type |
|--------|---------------|-----------|------------|--------------|-------------|--------|------|
| 1      | 9.32          | n.a.      | 12.105     | 4.290        | 6.19        | n.a.   | BMB* |
| 2      | 14.99         | n.a.      | 108.885    | 65.006       | 93.81       | n.a.   | BMB  |
| Total: |               |           | 120.991    | 69.295       | 100.00      | 0.000  |      |

default/integration

Chromeleon (c) Dionex 1996-2006  
 Version 6.80 (SR6a Build 2643 (158225))

Operator: dell Timebase: U-3000 Sequence: lyl

Page 1-1  
 2011-6-20 4:59

1710 lyl-lh-009-1-rac-oz-85/15-230

|                  |                               |                   |          |
|------------------|-------------------------------|-------------------|----------|
| Sample Name:     | lyl-lh-009-1-rac-oz-85/15-230 | Injection Volume: | 20.0     |
| Vial Number:     | 898                           | Channel:          | UV_VIS_1 |
| Sample Type:     | standard                      | Wavelength:       | 290      |
| Control Program: | Liu Yunlin                    | Bandwidth:        | n.a.     |
| Quantif. Method: | lyl                           | Dilution Factor:  | 1.0000   |
| Recording Time:  | 2011-6-20 16:40               | Sample Weight:    | 1.0000   |
| Run Time (min):  | 17.45                         | Sample Amount:    | 1.0000   |

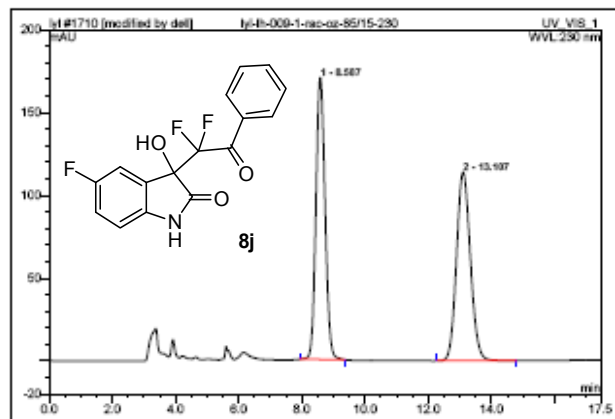

| No.    | Ret. Time min | Peak Name | Height mAU | Area mAU*min | Rel. Area % | Amount | Type |
|--------|---------------|-----------|------------|--------------|-------------|--------|------|
| 1      | 8.59          | n.a.      | 170.251    | 56.976       | 49.67       | n.a.   | BMB* |
| 2      | 13.11         | n.a.      | 113.896    | 57.742       | 50.33       | n.a.   | BMB  |
| Total: |               |           | 284.118    | 114.718      | 100.00      | 0.000  |      |

default/integration

Chromeleon (c) Dionex 1996-2006  
 Version 6.80 (SR8a Build 2643 (158225))

Operator: dell Timebase: U-3000 Sequence: lyl

Page 1-1  
 2011-6-20 4:58

1711 lyl-lh-009-1-asy-oz-85/15-230

|                  |                               |                   |          |
|------------------|-------------------------------|-------------------|----------|
| Sample Name:     | lyl-lh-009-1-asy-oz-85/15-230 | Injection Volume: | 20.0     |
| Vial Number:     | 898                           | Channel:          | UV_VIS_1 |
| Sample Type:     | standard                      | Wavelength:       | 290      |
| Control Program: | Liu Yunlin                    | Bandwidth:        | n.a.     |
| Quantif. Method: | lyl                           | Dilution Factor:  | 1.0000   |
| Recording Time:  | 2011-6-20 16:58               | Sample Weight:    | 1.0000   |
| Run Time (min):  | 14.53                         | Sample Amount:    | 1.0000   |

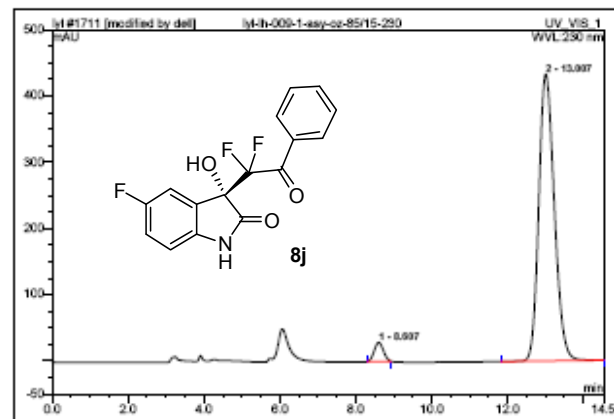

| No.    | Ret. Time min | Peak Name | Height mAU | Area mAU*min | Rel. Area % | Amount | Type |
|--------|---------------|-----------|------------|--------------|-------------|--------|------|
| 1      | 8.61          | n.a.      | 28.560     | 7.951        | 3.73        | n.a.   | BMB* |
| 2      | 13.01         | n.a.      | 433.147    | 205.268      | 96.27       | n.a.   | BMB  |
| Total: |               |           | 461.707    | 213.219      | 100.00      | 0.000  |      |

default/integration

Chromeleon (c) Dionex 1996-2006  
 Version 6.80 (SR8a Build 2643 (158225))

Operator:deli Timebase:U-3000 Sequence:yl

Page 1-1  
 2011-7-19 6:34

1652 lyl-Ig-138-1-*rac*-Oz-80/20-230

|                  |                                        |                   |          |
|------------------|----------------------------------------|-------------------|----------|
| Sample Name:     | lyl-Ig-138-1- <i>rac</i> -Oz-80/20-230 | Injection Volume: | 20.0     |
| Vial Number:     | 999                                    | Channel:          | UV_VIS_1 |
| Sample Type:     | standard                               | Wavelength:       | 290      |
| Control Program: | Liu Yunlin                             | Bandwidth:        | n.a.     |
| Quantif. Method: | lyl                                    | Dilution Factor:  | 1.0000   |
| Recording Time:  | 2011-8-11 18:06                        | Sample Weight:    | 1.0000   |
| Run Time (min):  | 10.23                                  | Sample Amount:    | 1.0000   |

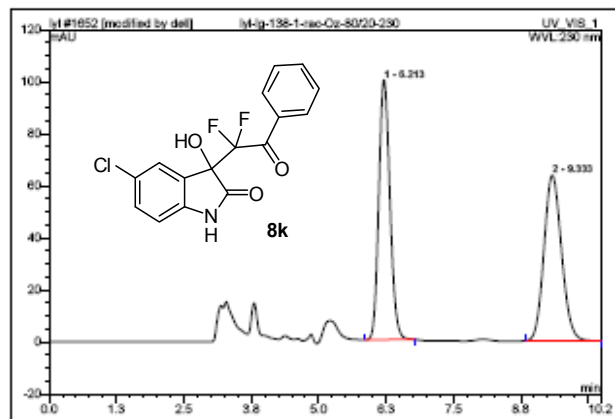

| No.    | Ret.Time min | Peak Name | Height mAU | Area mAU*min | Rel.Area % | Amount | Type |
|--------|--------------|-----------|------------|--------------|------------|--------|------|
| 1      | 6.21         | n.a.      | 95.849     | 23.853       | 49.95      | n.a.   | BMB* |
| 2      | 9.33         | n.a.      | 63.694     | 24.002       | 50.15      | n.a.   | BMB  |
| Total: |              |           | 163.433    | 47.855       | 100.00     | 0.000  |      |

default/integration

Chromeleon (c) Dionex 1996-2006  
 Version 6.80 (SR8a Build 2643 (158225))

Operator:deli Timebase:U-3000 Sequence:yl

Page 1-1  
 2011-7-19 6:35

1665 lyl-Ig-138-2-*asy*-Oz-80/20-230

|                  |                                        |                   |          |
|------------------|----------------------------------------|-------------------|----------|
| Sample Name:     | lyl-Ig-138-2- <i>asy</i> -Oz-80/20-230 | Injection Volume: | 20.0     |
| Vial Number:     | 999                                    | Channel:          | UV_VIS_1 |
| Sample Type:     | standard                               | Wavelength:       | 290      |
| Control Program: | Liu Yunlin                             | Bandwidth:        | n.a.     |
| Quantif. Method: | lyl                                    | Dilution Factor:  | 1.0000   |
| Recording Time:  | 2011-8-14 18:48                        | Sample Weight:    | 1.0000   |
| Run Time (min):  | 12.57                                  | Sample Amount:    | 1.0000   |

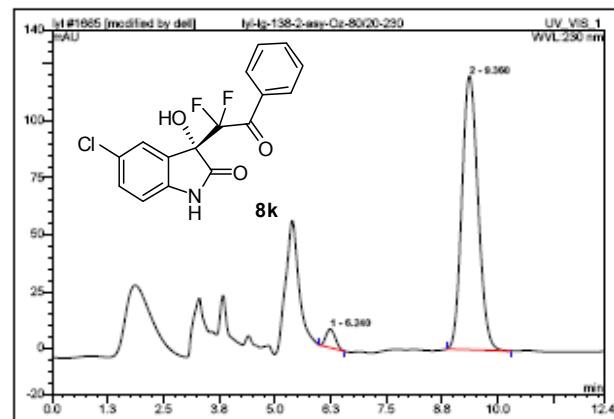

| No.    | Ret.Time min | Peak Name | Height mAU | Area mAU*min | Rel.Area % | Amount | Type |
|--------|--------------|-----------|------------|--------------|------------|--------|------|
| 1      | 6.24         | n.a.      | 8.191      | 1.997        | 3.82       | n.a.   | BMB* |
| 2      | 9.36         | n.a.      | 120.253    | 50.340       | 96.18      | n.a.   | BMB  |
| Total: |              |           | 128.443    | 52.337       | 100.00     | 0.000  |      |

default/integration

Chromeleon (c) Dionex 1996-2006  
 Version 6.80 (SR8a Build 2643 (158225))

Operator: dell Timebase: U-3000 Sequence: yl

Page 1-1  
 2011-6-21 6:47

1724 Iyl-Ih-009-3-raz-oz-85/15-230

|                  |                               |                   |          |
|------------------|-------------------------------|-------------------|----------|
| Sample Name:     | Iyl-Ih-009-3-raz-oz-85/15-230 | Injection Volume: | 20.0     |
| Vial Number:     | 898                           | Channel:          | UV_VIS_1 |
| Sample Type:     | standard                      | Wavelength:       | 290      |
| Control Program: | Liu Yunlin                    | Bandwidth:        | n.a.     |
| Quantif. Method: | Iyl                           | Dilution Factor:  | 1.0000   |
| Recording Time:  | 2011-6-21 18:13               | Sample Weight:    | 1.0000   |
| Run Time (min):  | 16.81                         | Sample Amount:    | 1.0000   |

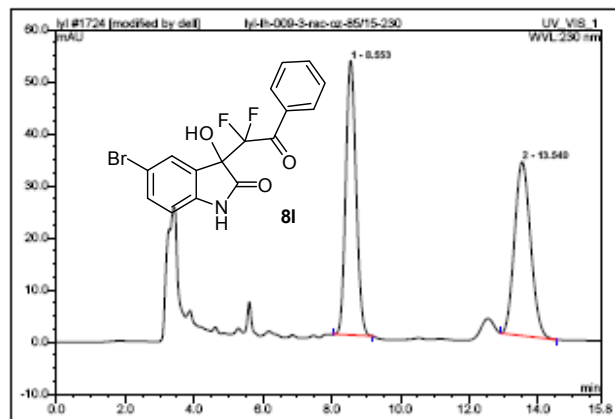

| No.    | Ret. Time min | Peak Name | Height mAU | Area mAU*min | Rel. Area % | Amount | Type |
|--------|---------------|-----------|------------|--------------|-------------|--------|------|
| 1      | 8.55          | n.a.      | 52.720     | 18.355       | 50.36       | n.a.   | BMB* |
| 2      | 13.54         | n.a.      | 33.380     | 18.089       | 49.64       | n.a.   | BMB  |
| Total: |               |           | 86.100     | 36.444       | 100.00      | 0.000  |      |

default/integration

Chromeleon (c) Dionex 1996-2006  
 Version 6.80 (SR6a Build 2643 (158225))

Operator: dell Timebase: U-3000 Sequence: yl

Page 1-1  
 2011-6-21 6:48

1725 Iyl-Ih-009-3-asy-oz-85/15-230

|                  |                               |                   |          |
|------------------|-------------------------------|-------------------|----------|
| Sample Name:     | Iyl-Ih-009-3-asy-oz-85/15-230 | Injection Volume: | 20.0     |
| Vial Number:     | 898                           | Channel:          | UV_VIS_1 |
| Sample Type:     | standard                      | Wavelength:       | 290      |
| Control Program: | Liu Yunlin                    | Bandwidth:        | n.a.     |
| Quantif. Method: | Iyl                           | Dilution Factor:  | 1.0000   |
| Recording Time:  | 2011-6-21 18:28               | Sample Weight:    | 1.0000   |
| Run Time (min):  | 16.28                         | Sample Amount:    | 1.0000   |

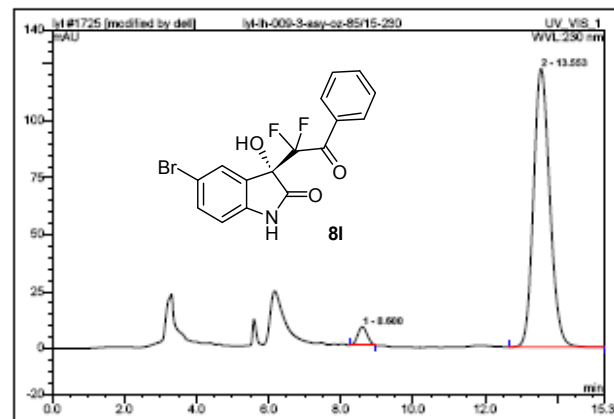

| No.    | Ret. Time min | Peak Name | Height mAU | Area mAU*min | Rel. Area % | Amount | Type |
|--------|---------------|-----------|------------|--------------|-------------|--------|------|
| 1      | 8.60          | n.a.      | 8.008      | 2.408        | 3.64        | n.a.   | BMB* |
| 2      | 13.55         | n.a.      | 122.234    | 63.834       | 96.36       | n.a.   | BMB  |
| Total: |               |           | 130.241    | 66.243       | 100.00      | 0.000  |      |

default/integration

Chromeleon (c) Dionex 1996-2006  
 Version 6.80 (SR6a Build 2643 (158225))

Operator: dell Timebase: U-3000 Sequence: yl

Page 1-1  
 2011-7-19 11:20

1902 Iyl-Ih-053-1-rao-oz-75/25-230

|                  |                               |                   |          |
|------------------|-------------------------------|-------------------|----------|
| Sample Name:     | Iyl-Ih-053-1-rao-oz-75/25-230 | Injection Volume: | 20.0     |
| Vial Number:     | 898                           | Channel:          | UV_VIS_1 |
| Sample Type:     | standard                      | Wavelength:       | 290      |
| Control Program: | Liu Yunlin                    | Bandwidth:        | n.a.     |
| Quantif. Method: | Iyl                           | Dilution Factor:  | 1.0000   |
| Recording Time:  | 2011-7-19 22:58               | Sample Weight:    | 1.0000   |
| Run Time (min):  | 10.89                         | Sample Amount:    | 1.0000   |

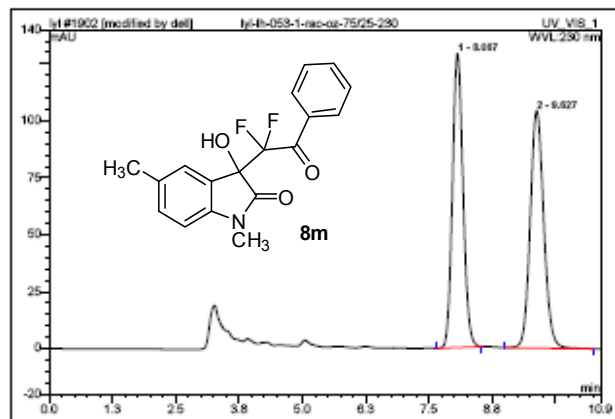

| No.    | Ret. Time min | Peak Name | Height mAU | Area mAU*min | Rel. Area % | Amount | Type |
|--------|---------------|-----------|------------|--------------|-------------|--------|------|
| 1      | 8.07          | n.a.      | 125.153    | 31.221       | 49.12       | n.a.   | BMB* |
| 2      | 9.63          | n.a.      | 104.358    | 32.339       | 50.88       | n.a.   | BMB  |
| Total: |               |           | 233.520    | 63.560       | 100.00      | 0.000  |      |

default/Integration

Chromeleon (c) Dionex 1996-2006  
 Version 6.80 (SR8a Build 2643 (158225))

Operator: dell Timebase: U-3000 Sequence: yl

Page 1-1  
 2011-7-19 11:20

1903 Iyl-Ih-053-1-asy-oz-75/25-230

|                  |                               |                   |          |
|------------------|-------------------------------|-------------------|----------|
| Sample Name:     | Iyl-Ih-053-1-asy-oz-75/25-230 | Injection Volume: | 20.0     |
| Vial Number:     | 898                           | Channel:          | UV_VIS_1 |
| Sample Type:     | standard                      | Wavelength:       | 290      |
| Control Program: | Liu Yunlin                    | Bandwidth:        | n.a.     |
| Quantif. Method: | Iyl                           | Dilution Factor:  | 1.0000   |
| Recording Time:  | 2011-7-19 23:07               | Sample Weight:    | 1.0000   |
| Run Time (min):  | 10.43                         | Sample Amount:    | 1.0000   |

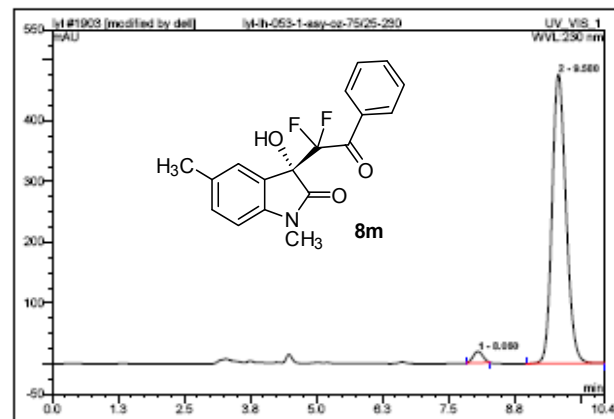

| No.    | Ret. Time min | Peak Name | Height mAU | Area mAU*min | Rel. Area % | Amount | Type |
|--------|---------------|-----------|------------|--------------|-------------|--------|------|
| 1      | 8.06          | n.a.      | 18.555     | 4.034        | 2.59        | n.a.   | BMB* |
| 2      | 9.58          | n.a.      | 476.457    | 145.675      | 97.31       | n.a.   | BMB  |
| Total: |               |           | 495.122    | 149.709      | 100.00      | 0.000  |      |

default/Integration

Chromeleon (c) Dionex 1996-2006  
 Version 6.80 (SR8a Build 2643 (158225))

Operator: dell Timebase: U-3000 Sequence: lyl

Page 1-1  
 2011-7-19 10:09

1889 lyl-IH-066-2-*rac*-oz-75/25-230

|                  |                                        |                   |          |
|------------------|----------------------------------------|-------------------|----------|
| Sample Name:     | lyl-IH-066-2- <i>rac</i> -oz-75/25-230 | Injection Volume: | 20.0     |
| Vial Number:     | 898                                    | Channel:          | UV_VIS_1 |
| Sample Type:     | standard                               | Wavelength:       | 290      |
| Control Program: | Liu Yunlin                             | Bandwidth:        | n.a.     |
| Quantif. Method: | lyl                                    | Dilution Factor:  | 1.0000   |
| Recording Time:  | 2011-7-19 18:04                        | Sample Weight:    | 1.0000   |
| Run Time (min):  | 14.48                                  | Sample Amount:    | 1.0000   |

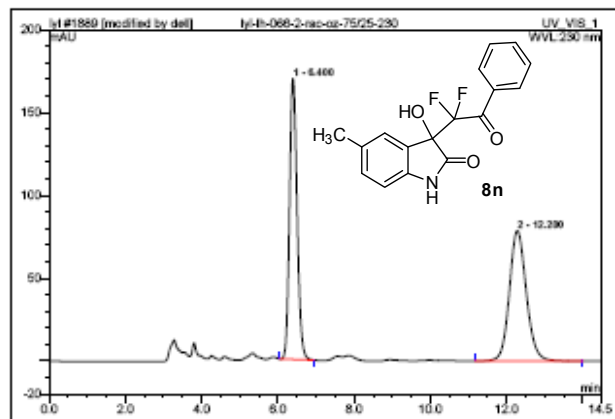

| No.    | Ret. Time min | Peak Name | Height mAU | Area mAU*min | Rel. Area % | Amount | Type |
|--------|---------------|-----------|------------|--------------|-------------|--------|------|
| 1      | 6.40          | n.a.      | 165.542    | 38.814       | 48.95       | n.a.   | BMB* |
| 2      | 12.28         | n.a.      | 78.674     | 40.483       | 51.05       | n.a.   | BMB  |
| Total: |               |           | 248.216    | 79.297       | 100.00      | 0.000  |      |

default/integration

Chromeleon (c) Dionex 1996-2006  
 Version 6.80 (SR6a Build 2643 (158225))

Operator: dell Timebase: U-3000 Sequence: lyl

Page 1-1  
 2011-7-19 10:11

1838 lyl-IH-066-2-*asy*-oz-75/25-230

|                  |                                        |                   |          |
|------------------|----------------------------------------|-------------------|----------|
| Sample Name:     | lyl-IH-066-2- <i>asy</i> -oz-75/25-230 | Injection Volume: | 20.0     |
| Vial Number:     | 898                                    | Channel:          | UV_VIS_1 |
| Sample Type:     | standard                               | Wavelength:       | 290      |
| Control Program: | Liu Yunlin                             | Bandwidth:        | n.a.     |
| Quantif. Method: | lyl                                    | Dilution Factor:  | 1.0000   |
| Recording Time:  | 2011-7-8 18:08                         | Sample Weight:    | 1.0000   |
| Run Time (min):  | 16.01                                  | Sample Amount:    | 1.0000   |

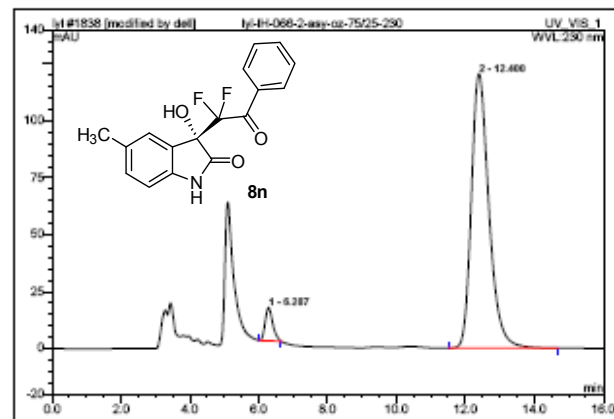

| No.    | Ret. Time min | Peak Name | Height mAU | Area mAU*min | Rel. Area % | Amount | Type |
|--------|---------------|-----------|------------|--------------|-------------|--------|------|
| 1      | 6.23          | n.a.      | 14.551     | 3.680        | 4.92        | n.a.   | BMB* |
| 2      | 12.40         | n.a.      | 120.438    | 71.116       | 95.08       | n.a.   | BMB  |
| Total: |               |           | 134.989    | 74.796       | 100.00      | 0.000  |      |

default/integration

Chromeleon (c) Dionex 1996-2006  
 Version 6.80 (SR6a Build 2643 (158225))

Operator: dell Timebase: U-3000 Sequence: ylj

Page 1-1  
 2011-7-17 9:42

1389 Iyl-I-148-2-RAC-OZH-85/15-230

|                  |                               |                   |          |
|------------------|-------------------------------|-------------------|----------|
| Sample Name:     | Iyl-I-148-2-RAC-OZH-85/15-230 | Injection Volume: | 20.0     |
| Vial Number:     | 898                           | Channel:          | UV_VIS_1 |
| Sample Type:     | standard                      | Wavelength:       | 290      |
| Control Program: | Liu Yunlin                    | Bandwidth:        | n.a.     |
| Quantif. Method: | Iyl                           | Dilution Factor:  | 1.0000   |
| Recording Time:  | 2011-4-28 14:16               | Sample Weight:    | 1.0000   |
| Run Time (min):  | 17.80                         | Sample Amount:    | 1.0000   |

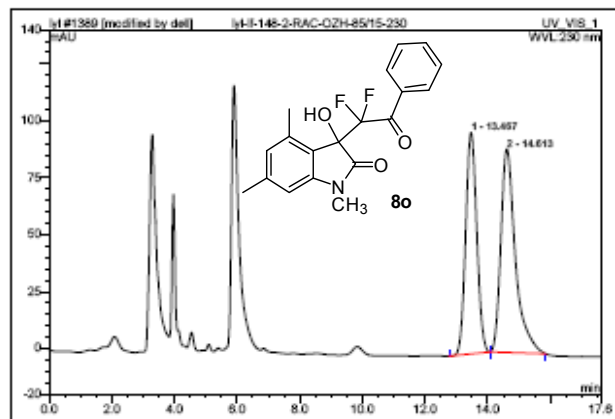

| No.    | Ret.Time min | Peak Name | Height mAU | Area mAU*min | Rel.Area % | Amount | Type |
|--------|--------------|-----------|------------|--------------|------------|--------|------|
| 1      | 13.47        | n.a.      | 97.255     | 35.742       | 45.23      | n.a.   | BMB* |
| 2      | 14.61        | n.a.      | 85.393     | 48.130       | 54.77      | n.a.   | BMB* |
| Total: |              |           | 186.648    | 87.871       | 100.00     | 0.000  |      |

default/integration

Chromeleon (c) Dionex 1996-2006  
 Version 6.80 (SR8a Build 2643 (158225))

Operator: dell Timebase: U-3000 Sequence: ylj

Page 1-1  
 2011-7-17 9:43

1576 Iyl-Ig-073-1-asy-OZ-90/10-230

|                  |                               |                   |          |
|------------------|-------------------------------|-------------------|----------|
| Sample Name:     | Iyl-Ig-073-1-asy-OZ-90/10-230 | Injection Volume: | 20.0     |
| Vial Number:     | 898                           | Channel:          | UV_VIS_1 |
| Sample Type:     | standard                      | Wavelength:       | 290      |
| Control Program: | Liu Yunlin                    | Bandwidth:        | n.a.     |
| Quantif. Method: | Iyl                           | Dilution Factor:  | 1.0000   |
| Recording Time:  | 2011-5-28 18:18               | Sample Weight:    | 1.0000   |
| Run Time (min):  | 17.79                         | Sample Amount:    | 1.0000   |

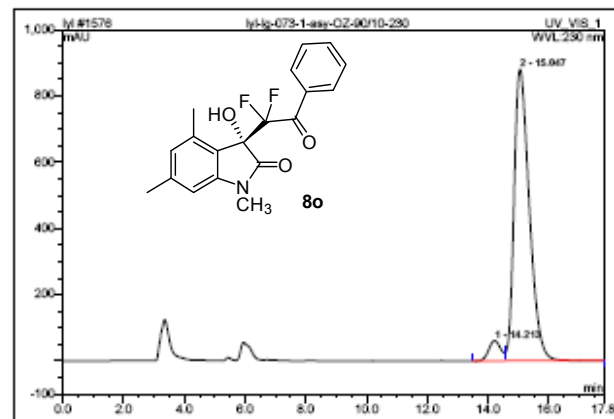

| No.    | Ret.Time min | Peak Name | Height mAU | Area mAU*min | Rel.Area % | Amount | Type |
|--------|--------------|-----------|------------|--------------|------------|--------|------|
| 1      | 14.21        | n.a.      | 60.600     | 27.480       | 5.09       | n.a.   | BM   |
| 2      | 15.05        | n.a.      | 880.025    | 512.691      | 94.91      | n.a.   | MB   |
| Total: |              |           | 940.625    | 540.161      | 100.00     | 0.000  |      |

default/integration

Chromeleon (c) Dionex 1996-2006  
 Version 6.80 (SR8a Build 2643 (158225))



Operator: dell Timebase: U-3000 Sequence: yl

Page 1-1  
 2011-7-17 10:44

1879 Iyl-Ih-067-1-rac-oz-80/20-230

|                  |                               |                   |          |
|------------------|-------------------------------|-------------------|----------|
| Sample Name:     | Iyl-Ih-067-1-rac-oz-80/20-230 | Injection Volume: | 20.0     |
| Vial Number:     | 898                           | Channel:          | UV_VIS_1 |
| Sample Type:     | standard                      | Wavelength:       | 290      |
| Control Program: | Liu Yunlin                    | Bandwidth:        | n.a.     |
| Quantif. Method: | Iyl                           | Dilution Factor:  | 1.0000   |
| Recording Time:  | 2011-7-17 21:56               | Sample Weight:    | 1.0000   |
| Run Time (min):  | 21.81                         | Sample Amount:    | 1.0000   |

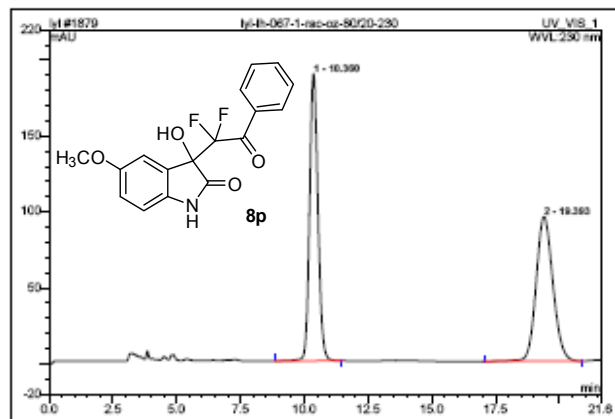

| No.    | Ret. Time min | Peak Name | Height mAU | Area mAU*min | Rel. Area % | Amount | Type |
|--------|---------------|-----------|------------|--------------|-------------|--------|------|
| 1      | 10.36         | n.a.      | 185.106    | 71.831       | 49.72       | n.a.   | BMB  |
| 2      | 19.39         | n.a.      | 95.074     | 72.635       | 50.28       | n.a.   | BMB  |
| Total: |               |           | 284.180    | 144.466      | 100.00      | 0.000  |      |

default/Integration

Chromeleon (c) Dionex 1996-2006  
 Version 6.80 (SR8a Build 2643 (158225))

Operator: dell Timebase: U-3000 Sequence: yl

Page 1-2  
 2011-7-17 10:43

1880 Iyl-Ih-067-1-ASY-oz-80/20-230

|                  |                               |                   |          |
|------------------|-------------------------------|-------------------|----------|
| Sample Name:     | Iyl-Ih-067-1-ASY-oz-80/20-230 | Injection Volume: | 20.0     |
| Vial Number:     | 898                           | Channel:          | UV_VIS_1 |
| Sample Type:     | standard                      | Wavelength:       | 290      |
| Control Program: | Liu Yunlin                    | Bandwidth:        | n.a.     |
| Quantif. Method: | Iyl                           | Dilution Factor:  | 1.0000   |
| Recording Time:  | 2011-7-17 22:18               | Sample Weight:    | 1.0000   |
| Run Time (min):  | 21.28                         | Sample Amount:    | 1.0000   |

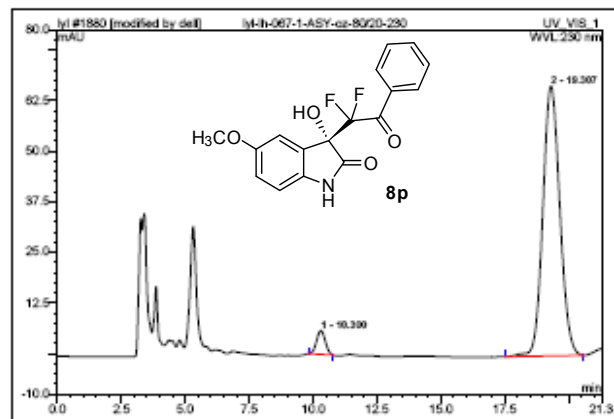

| No.    | Ret. Time min | Peak Name | Height mAU | Area mAU*min | Rel. Area % | Amount | Type |
|--------|---------------|-----------|------------|--------------|-------------|--------|------|
| 1      | 10.30         | n.a.      | 5.875      | 2.317        | 4.32        | n.a.   | BMB* |
| 2      | 19.31         | n.a.      | 66.607     | 51.346       | 95.68       | n.a.   | BMB  |
| Total: |               |           | 72.482     | 53.664       | 100.00      | 0.000  |      |

default/Integration

Chromeleon (c) Dionex 1996-2006  
 Version 6.80 (SR8a Build 2643 (158225))

Operator:deli Timebase:U-3000 Sequence:lyl

Page 1-1  
 2011-10-28 4:10

2125 lyl-II-070-2-RAC-OZ-1.0-85/15-230

|                  |                                   |                   |          |
|------------------|-----------------------------------|-------------------|----------|
| Sample Name:     | lyl-II-070-2-RAC-OZ-1.0-85/15-230 | Injection Volume: | 20.0     |
| Vial Number:     | 898                               | Channel:          | UV_VIS_1 |
| Sample Type:     | standard                          | Wavelength:       | 290      |
| Control Program: | Liu Yunlin                        | Bandwidth:        | n.a.     |
| Quantif. Method: | lyl                               | Dilution Factor:  | 1.0000   |
| Recording Time:  | 2011-10-28 14:48                  | Sample Weight:    | 1.0000   |
| Run Time (min):  | 17.88                             | Sample Amount:    | 1.0000   |

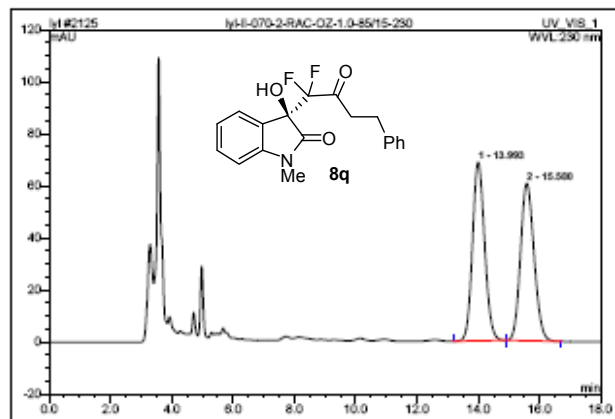

| No.    | Ret.Time min | Peak Name | Height mAU | Area mAU*min | Rel.Area % | Amount | Type |
|--------|--------------|-----------|------------|--------------|------------|--------|------|
| 1      | 13.99        | n.a.      | 68.661     | 31.588       | 50.41      | n.a.   | BMB  |
| 2      | 15.58        | n.a.      | 60.499     | 31.077       | 49.59      | n.a.   | BMB  |
| Total: |              |           | 129.160    | 62.665       | 100.00     | 0.000  |      |

default/integration

Chromleon (c) Dionex 1996-2006  
 Version 6.80 SR8a Build 2643 (158225)

Operator:deli Timebase:U-3000 Sequence:lyl

Page 1-1  
 2011-10-28 4:09

2123 lyl-II-070-2-ASY-OZ-1.0-85/15-230

|                  |                                   |                   |          |
|------------------|-----------------------------------|-------------------|----------|
| Sample Name:     | lyl-II-070-2-ASY-OZ-1.0-85/15-230 | Injection Volume: | 20.0     |
| Vial Number:     | 898                               | Channel:          | UV_VIS_1 |
| Sample Type:     | standard                          | Wavelength:       | 290      |
| Control Program: | Liu Yunlin                        | Bandwidth:        | n.a.     |
| Quantif. Method: | lyl                               | Dilution Factor:  | 1.0000   |
| Recording Time:  | 2011-10-28 18:67                  | Sample Weight:    | 1.0000   |
| Run Time (min):  | 21.87                             | Sample Amount:    | 1.0000   |

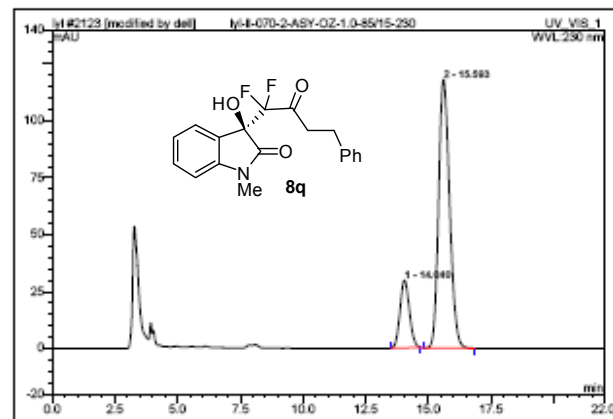

| No.    | Ret.Time min | Peak Name | Height mAU | Area mAU*min | Rel.Area % | Amount | Type |
|--------|--------------|-----------|------------|--------------|------------|--------|------|
| 1      | 14.04        | n.a.      | 29.642     | 12.886       | 17.72      | n.a.   | BMB* |
| 2      | 15.59        | n.a.      | 117.983    | 59.831       | 82.28      | n.a.   | BMB* |
| Total: |              |           | 147.625    | 72.717       | 100.00     | 0.000  |      |

default/integration

Chromleon (c) Dionex 1996-2006  
 Version 6.80 SR8a Build 2643 (158225)

Operator: dell Timebase: U-3000 Sequence: ylj

Page 1-1  
 2011-7-23 10:20

| 1929 Iyl-Ih-084-1-RAC-IC-85/15-230 |                               |                   |          |
|------------------------------------|-------------------------------|-------------------|----------|
| Sample Name:                       | Iyl-Ih-084-1-RAC-IC-85/15-230 | Injection Volume: | 20.0     |
| Vial Number:                       | 898                           | Channel:          | UV_VIS_1 |
| Sample Type:                       | standard                      | Wavelength:       | 290      |
| Control Program:                   | Liu Yunlin                    | Bandwidth:        | n.a.     |
| Quantif. Method:                   | Iyl                           | Dilution Factor:  | 1.0000   |
| Recording Time:                    | 2011-7-23 21:14               | Sample Weight:    | 1.0000   |
| Run Time (min):                    | 28.07                         | Sample Amount:    | 1.0000   |

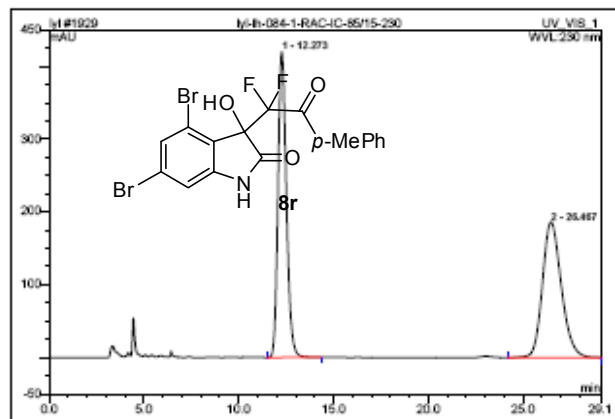

| No.    | Ret. Time min | Peak Name | Height mAU | Area mAU*min | Rel. Area % | Amount | Type |
|--------|---------------|-----------|------------|--------------|-------------|--------|------|
| 1      | 12.27         | n.a.      | 415.357    | 214.588      | 50.03       | n.a.   | BMB  |
| 2      | 25.47         | n.a.      | 185.976    | 214.434      | 49.97       | n.a.   | BMB  |
| Total: |               |           | 605.334    | 429.122      | 100.00      | 0.000  |      |

default/Integration

Chromeleon (c) Dionex 1996-2006  
 Version 6.80 (SR8a Build 2643 (158225))

Operator: dell Timebase: U-3000 Sequence: ylj

Page 1-1  
 2011-7-23 10:19

| 1927 Iyl-Ih-084-1-ASY-IC-85/15-230 |                               |                   |          |
|------------------------------------|-------------------------------|-------------------|----------|
| Sample Name:                       | Iyl-Ih-084-1-ASY-IC-85/15-230 | Injection Volume: | 20.0     |
| Vial Number:                       | 898                           | Channel:          | UV_VIS_1 |
| Sample Type:                       | standard                      | Wavelength:       | 290      |
| Control Program:                   | Liu Yunlin                    | Bandwidth:        | n.a.     |
| Quantif. Method:                   | Iyl                           | Dilution Factor:  | 1.0000   |
| Recording Time:                    | 2011-7-23 20:11               | Sample Weight:    | 1.0000   |
| Run Time (min):                    | 27.85                         | Sample Amount:    | 1.0000   |

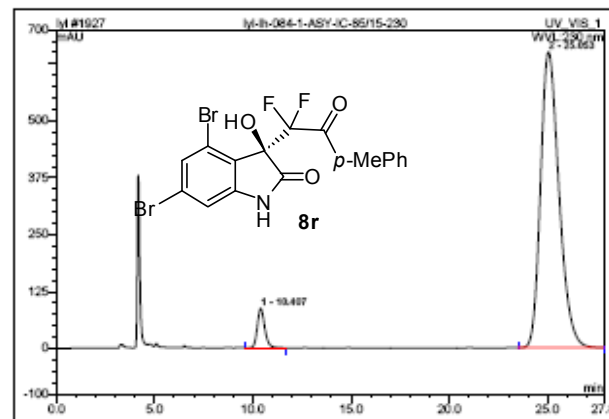

| No.    | Ret. Time min | Peak Name | Height mAU | Area mAU*min | Rel. Area % | Amount | Type |
|--------|---------------|-----------|------------|--------------|-------------|--------|------|
| 1      | 10.41         | n.a.      | 86.120     | 37.526       | 5.05        | n.a.   | BMB  |
| 2      | 25.05         | n.a.      | 649.436    | 707.302      | 94.95       | n.a.   | BMB  |
| Total: |               |           | 735.557    | 744.828      | 100.00      | 0.000  |      |

default/Integration

Chromeleon (c) Dionex 1996-2006  
 Version 6.80 (SR8a Build 2643 (158225))

Operator: dell Timebase: U-3000 Sequence: lyl

Page 1-1  
 2011-7-17 10:16

1860 lyl-IH-080-rac-oj-80/20-230

|                  |                             |                   |          |
|------------------|-----------------------------|-------------------|----------|
| Sample Name:     | lyl-IH-080-rac-oj-80/20-230 | Injection Volume: | 20.0     |
| Vial Number:     | 898                         | Channel:          | UV_VIS_1 |
| Sample Type:     | standard                    | Wavelength:       | 290      |
| Control Program: | Liu Yunlin                  | Bandwidth:        | n.a.     |
| Quantif. Method: | lyl                         | Dilution Factor:  | 1.0000   |
| Recording Time:  | 2011-7-10 17:08             | Sample Weight:    | 1.0000   |
| Run Time (min):  | 28.40                       | Sample Amount:    | 1.0000   |

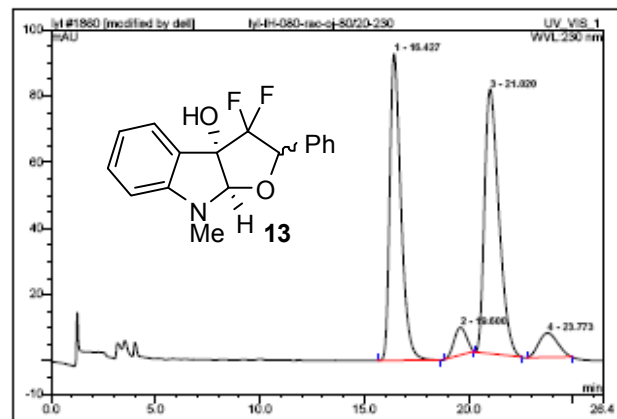

| No.    | Ret. Time min | Peak Name | Height mAU | Area mAU*min | Rel. Area % | Amount | Type |
|--------|---------------|-----------|------------|--------------|-------------|--------|------|
| 1      | 16.43         | n.a.      | 92.548     | 57.264       | 42.64       | n.a.   | BMB* |
| 2      | 19.60         | n.a.      | 8.323      | 5.682        | 4.23        | n.a.   | BMB* |
| 3      | 21.02         | n.a.      | 79.895     | 63.644       | 47.39       | n.a.   | BMB* |
| 4      | 23.77         | n.a.      | 7.327      | 7.719        | 5.75        | n.a.   | BMB* |
| Total: |               |           | 188.083    | 134.309      | 100.00      | 0.000  |      |

default/integration

Chromeleon (c) Dionex 1996-2006  
 Version 6.80 (SR8a Build 2643 (158225))

Operator: dell Timebase: U-3000 Sequence: lyl

Page 1-1  
 2011-7-17 10:15

1863 lyl-IH-080-ASY-OJ-80/20-230

|                  |                             |                   |          |
|------------------|-----------------------------|-------------------|----------|
| Sample Name:     | lyl-IH-080-ASY-OJ-80/20-230 | Injection Volume: | 20.0     |
| Vial Number:     | 898                         | Channel:          | UV_VIS_1 |
| Sample Type:     | standard                    | Wavelength:       | 290      |
| Control Program: | Liu Yunlin                  | Bandwidth:        | n.a.     |
| Quantif. Method: | lyl                         | Dilution Factor:  | 1.0000   |
| Recording Time:  | 2011-7-14 18:18             | Sample Weight:    | 1.0000   |
| Run Time (min):  | 27.89                       | Sample Amount:    | 1.0000   |

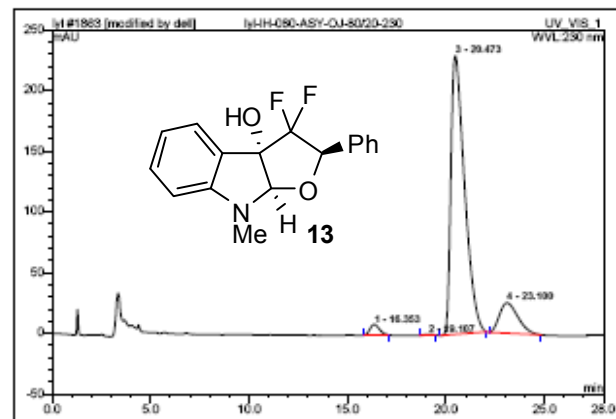

| No.    | Ret. Time min | Peak Name | Height mAU | Area mAU*min | Rel. Area % | Amount | Type |
|--------|---------------|-----------|------------|--------------|-------------|--------|------|
| 1      | 16.35         | n.a.      | 8.757      | 4.755        | 2.19        | n.a.   | BMB* |
| 2      | 19.11         | n.a.      | 0.545      | 0.266        | 0.12        | n.a.   | BMB* |
| 3      | 20.47         | n.a.      | 229.264    | 184.668      | 85.14       | n.a.   | BMB* |
| 4      | 23.10         | n.a.      | 24.927     | 27.201       | 12.54       | n.a.   | BMB* |
| Total: |               |           | 263.484    | 216.890      | 100.00      | 0.000  |      |

default/integration

Chromeleon (c) Dionex 1996-2006  
 Version 6.80 (SR8a Build 2643 (158225))

Operator: dell Timebase: U-3000 Sequence: lyl

Page 1-1  
 2011-7-21 10:08

1916 lyl-lh-084-1-*rac*-od-85/15-230

|                  |                                        |                   |          |
|------------------|----------------------------------------|-------------------|----------|
| Sample Name:     | lyl-lh-084-1- <i>rac</i> -od-85/15-230 | Injection Volume: | 20.0     |
| Vial Number:     | 898                                    | Channel:          | UV_VIS_1 |
| Sample Type:     | standard                               | Wavelength:       | 290      |
| Control Program: | Liu Yunlin                             | Bandwidth:        | n.a.     |
| Quantif. Method: | lyl                                    | Dilution Factor:  | 1.0000   |
| Recording Time:  | 2011-7-21 9:57                         | Sample Weight:    | 1.0000   |
| Run Time (min):  | 18.20                                  | Sample Amount:    | 1.0000   |

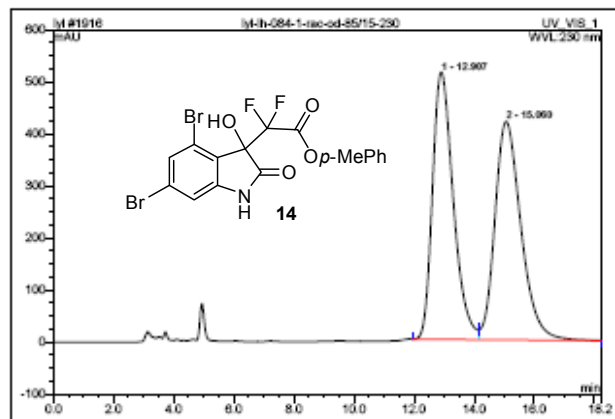

| No.    | Ret. Time min | Peak Name | Height mAU | Area mAU*min | Rel. Area % | Amount | Type |
|--------|---------------|-----------|------------|--------------|-------------|--------|------|
| 1      | 12.91         | n.a.      | 513.660    | 410.647      | 49.32       | n.a.   | BM   |
| 2      | 15.05         | n.a.      | 419.610    | 421.995      | 50.68       | n.a.   | MB   |
| Total: |               |           | 933.270    | 832.642      | 100.00      | 0.000  |      |

default/integration

Chromeleon (c) Dionex 1996-2006  
 Version 6.80 (SR8a Build 2643 (158225))

Operator: dell Timebase: U-3000 Sequence: lyl

Page 1-1  
 2011-7-21 10:09

1915 lyl-lh-084-1-*asy*-od-85/15-230

|                  |                                        |                   |          |
|------------------|----------------------------------------|-------------------|----------|
| Sample Name:     | lyl-lh-084-1- <i>asy</i> -od-85/15-230 | Injection Volume: | 20.0     |
| Vial Number:     | 898                                    | Channel:          | UV_VIS_1 |
| Sample Type:     | standard                               | Wavelength:       | 290      |
| Control Program: | Liu Yunlin                             | Bandwidth:        | n.a.     |
| Quantif. Method: | lyl                                    | Dilution Factor:  | 1.0000   |
| Recording Time:  | 2011-7-21 9:33                         | Sample Weight:    | 1.0000   |
| Run Time (min):  | 22.52                                  | Sample Amount:    | 1.0000   |

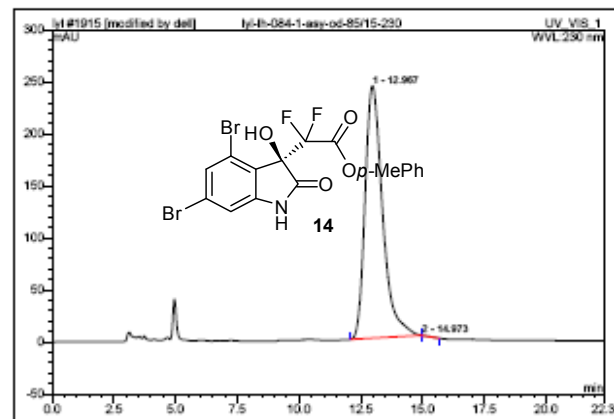

| No.    | Ret. Time min | Peak Name | Height mAU | Area mAU*min | Rel. Area % | Amount | Type |
|--------|---------------|-----------|------------|--------------|-------------|--------|------|
| 1      | 12.97         | n.a.      | 242.307    | 199.121      | 99.98       | n.a.   | BMB* |
| 2      | 14.97         | n.a.      | 0.003      | 0.033        | 0.02        | n.a.   | BMB* |
| Total: |               |           | 242.310    | 199.154      | 100.00      | 0.000  |      |

default/integration

Chromeleon (c) Dionex 1996-2006  
 Version 6.80 (SR8a Build 2643 (158225))

Operator: dell Timebase: U-3000 Sequence: yl

Page 1-1  
 2011-7-19 11:41

1904 Iyl-Ih-083-1-raz-oz-75/25-230

|                  |                               |                   |          |
|------------------|-------------------------------|-------------------|----------|
| Sample Name:     | Iyl-Ih-083-1-raz-oz-75/25-230 | Injection Volume: | 20.0     |
| Vial Number:     | 898                           | Channel:          | UV_VIS_1 |
| Sample Type:     | standard                      | Wavelength:       | 290      |
| Control Program: | Liu Yunlin                    | Bandwidth:        | n.a.     |
| Quantif. Method: | Iyl                           | Dilution Factor:  | 1.0000   |
| Recording Time:  | 2011-7-19 23:18               | Sample Weight:    | 1.0000   |
| Run Time (min):  | 10.21                         | Sample Amount:    | 1.0000   |

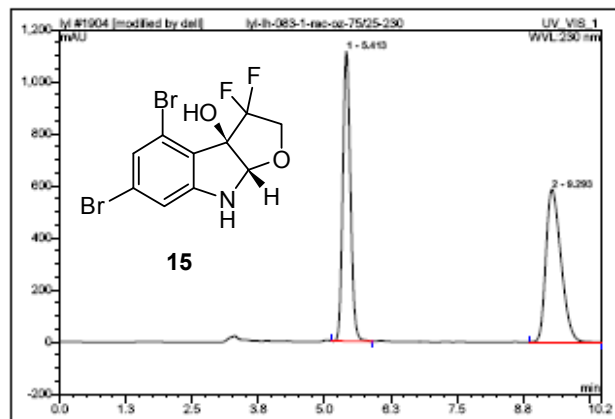

| No.    | Ret. Time min | Peak Name | Height mAU | Area mAU*min | Rel. Area % | Amount | Type |
|--------|---------------|-----------|------------|--------------|-------------|--------|------|
| 1      | 5.41          | n.a.      | 1112.617   | 186.173      | 49.09       | n.a.   | BMB* |
| 2      | 9.29          | n.a.      | 886.678    | 193.057      | 50.91       | n.a.   | BMB  |
| Total: |               |           | 1699.295   | 379.240      | 100.00      | 0.000  |      |

default/Integration

Chromeleon (c) Dionex 1996-2006  
 Version 6.80 (SR6a Build 2643 (158225))

Operator: dell Timebase: U-3000 Sequence: yl

Page 1-2  
 2011-7-19 11:41

1905 Iyl-Ih-083-1-asy-oz-75/25-230

|                  |                               |                   |          |
|------------------|-------------------------------|-------------------|----------|
| Sample Name:     | Iyl-Ih-083-1-asy-oz-75/25-230 | Injection Volume: | 20.0     |
| Vial Number:     | 898                           | Channel:          | UV_VIS_1 |
| Sample Type:     | standard                      | Wavelength:       | 290      |
| Control Program: | Liu Yunlin                    | Bandwidth:        | n.a.     |
| Quantif. Method: | Iyl                           | Dilution Factor:  | 1.0000   |
| Recording Time:  | 2011-7-19 23:28               | Sample Weight:    | 1.0000   |
| Run Time (min):  | 10.58                         | Sample Amount:    | 1.0000   |

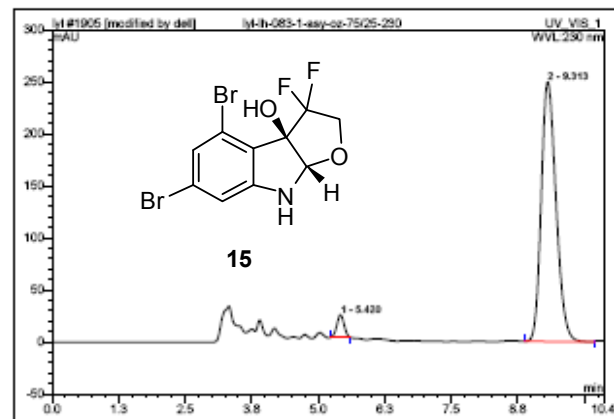

| No.    | Ret. Time min | Peak Name | Height mAU | Area mAU*min | Rel. Area % | Amount | Type |
|--------|---------------|-----------|------------|--------------|-------------|--------|------|
| 1      | 5.42          | n.a.      | 21.555     | 3.402        | 4.06        | n.a.   | BMB* |
| 2      | 9.31          | n.a.      | 249.299    | 80.451       | 95.94       | n.a.   | BMB  |
| Total: |               |           | 270.854    | 83.853       | 100.00      | 0.000  |      |

default/Integration

Chromeleon (c) Dionex 1996-2006  
 Version 6.80 (SR6a Build 2643 (158225))

Operator: dell Timebase: U-3000 Sequence: yl

Page 1-1  
 2011-7-17 10:26

1870 Iyl-Ih-083-2-~~rac~~-oz-80/20-230

|                  |                                            |                   |          |
|------------------|--------------------------------------------|-------------------|----------|
| Sample Name:     | Iyl-Ih-083-2- <del>rac</del> -oz-80/20-230 | Injection Volume: | 20.0     |
| Vial Number:     | 898                                        | Channel:          | UV_VIS_1 |
| Sample Type:     | standard                                   | Wavelength:       | 290      |
| Control Program: | Liu Yunlin                                 | Bandwidth:        | n.a.     |
| Quantif. Method: | Iyl                                        | Dilution Factor:  | 1.0000   |
| Recording Time:  | 2011-7-17 10:48                            | Sample Weight:    | 1.0000   |
| Run Time (min):  | 18.09                                      | Sample Amount:    | 1.0000   |

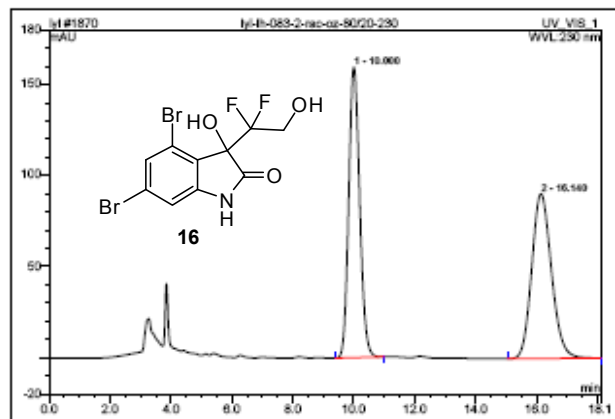

| No.    | Ret.Time min | Peak Name | Height mAU | Area mAU*min | Rel.Area % | Amount | Type |
|--------|--------------|-----------|------------|--------------|------------|--------|------|
| 1      | 10.00        | n.a.      | 155.393    | 66.391       | 49.56      | n.a.   | BMB  |
| 2      | 16.14        | n.a.      | 90.411     | 67.576       | 50.44      | n.a.   | BMB  |
| Total: |              |           | 245.804    | 133.967      | 100.00     | 0.000  |      |

default/integration

Chromeleon (c) Dionex 1996-2006  
 Version 6.80 (SR8a Build 2643 (158225))

Operator: dell Timebase: U-3000 Sequence: yl

Page 1-1  
 2011-7-17 10:26

1869 Iyl-Ih-083-2-~~asy~~-oz-80/20-230

|                  |                                            |                   |          |
|------------------|--------------------------------------------|-------------------|----------|
| Sample Name:     | Iyl-Ih-083-2- <del>asy</del> -oz-80/20-230 | Injection Volume: | 20.0     |
| Vial Number:     | 898                                        | Channel:          | UV_VIS_1 |
| Sample Type:     | standard                                   | Wavelength:       | 290      |
| Control Program: | Liu Yunlin                                 | Bandwidth:        | n.a.     |
| Quantif. Method: | Iyl                                        | Dilution Factor:  | 1.0000   |
| Recording Time:  | 2011-7-17 10:24                            | Sample Weight:    | 1.0000   |
| Run Time (min):  | 18.77                                      | Sample Amount:    | 1.0000   |

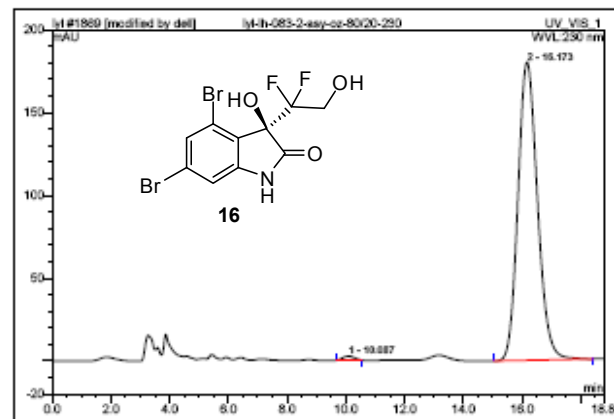

| No.    | Ret.Time min | Peak Name | Height mAU | Area mAU*min | Rel.Area % | Amount | Type |
|--------|--------------|-----------|------------|--------------|------------|--------|------|
| 1      | 10.09        | n.a.      | 2.408      | 1.102        | 0.79       | n.a.   | BMB* |
| 2      | 16.17        | n.a.      | 180.066    | 138.212      | 99.21      | n.a.   | BMB  |
| Total: |              |           | 182.473    | 139.314      | 100.00     | 0.000  |      |

default/integration

Chromeleon (c) Dionex 1996-2006  
 Version 6.80 (SR8a Build 2643 (158225))

Operator: dell Timebase: U-3000 Sequence: lyl

Page 1-1  
 2011-7-31 9:00

1933 lyl-lh-022-1-RAC-OZ-85/15-230

|                  |                               |                   |          |
|------------------|-------------------------------|-------------------|----------|
| Sample Name:     | lyl-lh-022-1-RAC-OZ-85/15-230 | Injection Volume: | 20.0     |
| Vial Number:     | 898                           | Channel:          | UV_VIS_1 |
| Sample Type:     | standard                      | Wavelength:       | 290      |
| Control Program: | Liu Yunlin                    | Bandwidth:        | n.a.     |
| Quantif. Method: | lyl                           | Dilution Factor:  | 1.0000   |
| Recording Time:  | 2011-7-31 20:38               | Sample Weight:    | 1.0000   |
| Run Time (min):  | 8.71                          | Sample Amount:    | 1.0000   |

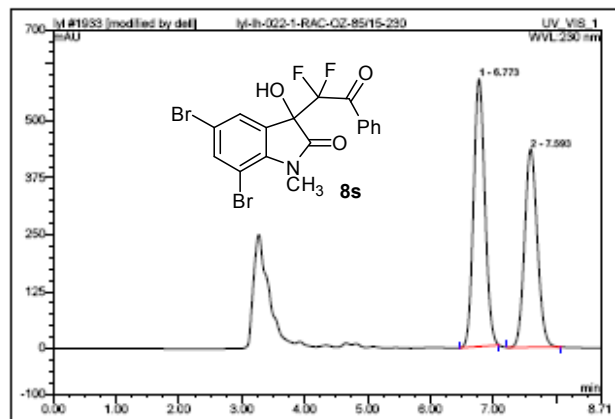

| No.    | Ret.Time min | Peak Name | Height mAU | Area mAU*min | Rel.Area % | Amount | Type |
|--------|--------------|-----------|------------|--------------|------------|--------|------|
| 1      | 6.77         | n.a.      | 587.947    | 122.755      | 54.50      | n.a.   | BMB* |
| 2      | 7.59         | n.a.      | 435.544    | 102.466      | 45.50      | n.a.   | BMB* |
| Total: |              |           | 1023.491   | 225.221      | 100.00     | 0.000  |      |

default/integration

Chromeleon (c) Dionex 1996-2006  
 Version 6.80 (SR8a Build 2643 (158225))

Operator: dell Timebase: U-3000 Sequence: lyl

Page 1-2  
 2011-7-31 9:01

1934 lyl-lh-022-1-ASY-OZ-85/15-230

|                  |                               |                   |          |
|------------------|-------------------------------|-------------------|----------|
| Sample Name:     | lyl-lh-022-1-ASY-OZ-85/15-230 | Injection Volume: | 20.0     |
| Vial Number:     | 898                           | Channel:          | UV_VIS_1 |
| Sample Type:     | standard                      | Wavelength:       | 290      |
| Control Program: | Liu Yunlin                    | Bandwidth:        | n.a.     |
| Quantif. Method: | lyl                           | Dilution Factor:  | 1.0000   |
| Recording Time:  | 2011-7-31 20:48               | Sample Weight:    | 1.0000   |
| Run Time (min):  | 8.88                          | Sample Amount:    | 1.0000   |

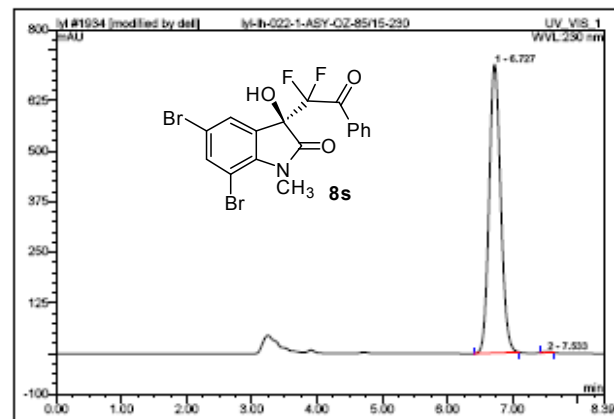

| No.    | Ret.Time min | Peak Name | Height mAU | Area mAU*min | Rel.Area % | Amount | Type |
|--------|--------------|-----------|------------|--------------|------------|--------|------|
| 1      | 6.73         | n.a.      | 712.688    | 145.803      | 99.79      | n.a.   | BMB* |
| 2      | 7.53         | n.a.      | 2.319      | 0.312        | 0.21       | n.a.   | BMB* |
| Total: |              |           | 715.007    | 146.115      | 100.00     | 0.000  |      |

default/integration

Chromeleon (c) Dionex 1996-2006  
 Version 6.80 (SR8a Build 2643 (158225))
